# Supplementary material for: Structurally Rigid (8-(Arylimino)-5,6,7-trihydroquinolin-2-yl)-methyl Acetate Cobalt Complex Catalysts for Isoprene Polymerization with High Activity and cis-1,4 Selectivity
Source: MDPI journal article supplement (doi:10.3390/catal13071120), 2023-07-18
Supplement: s1 [file s1]

---

## Supplementary Materials

# Structurally Rigid (8-(Arylimino)-5,6,7-trihydroquinolin-2-yl)-methyl Acetate Cobalt Complex Catalysts for Isoprene Polymerization with High Activity and *cis*-1,4 Selectivity

Nighat Yousuf <sup>1,2,3</sup>, Yanping Ma <sup>1,\*</sup>, Qaiser Mahmood <sup>2,\*</sup>, Wenjuan Zhang <sup>4,\*</sup>, Ming Liu <sup>1,3</sup>, Rongyan Yuan <sup>2</sup> and Wen-Hua Sun <sup>1,2,3,\*</sup>

<sup>1</sup> Key Laboratory of Engineering Plastics and Beijing National Laboratory for Molecular Science, Institute of Chemistry, Chinese Academy of Sciences, Beijing 100190, China; nigiyousuf@iccas.ac.cn (N.Y.); liuming@iccas.ac.cn (M.L.)

<sup>2</sup> Chemistry and Chemical Engineering Guangdong Laboratory, Shantou 515031, China; 1020210212@glut.edu.cn

<sup>3</sup> CAS Research/Education Center for Excellence in Molecular Sciences and International School, University of Chinese Academy of Sciences, Beijing 100049, China

<sup>4</sup> Beijing Key Laboratory of Clothing Materials R&D and Assessment, School of Materials Science and Engineering, Beijing Institute of Fashion Technology, Beijing 100029, China

\* Correspondence: myanping@iccas.ac.cn (Y.M.); qaiser@cclab.com.cn (Q.M.); zhangwj@bift.edu.cn (W.Z.); whsun@iccas.ac.cn (W.-H.S.); Tel.: +86-1062557955 (Y.M & W.-H.S.)

---

### Table of contents

|                                                                                                                                                    |           |
|----------------------------------------------------------------------------------------------------------------------------------------------------|-----------|
| <b>Figure S1.</b> <sup>1</sup> H and <sup>13</sup> C NMR spectra of the polyisoprene obtained using Co1/AlMe <sub>2</sub> Cl (Table 2, entry 3).   | <b>3</b>  |
| <b>Figure S2.</b> <sup>1</sup> H and <sup>13</sup> C NMR spectra of the polyisoprene obtained using Co1/AlMe <sub>2</sub> Cl (Table 2, entry 4).   | <b>4</b>  |
| <b>Figure S3.</b> <sup>1</sup> H and <sup>13</sup> C NMR spectra of the polyisoprene obtained using Co1/AlMe <sub>2</sub> Cl (Table 2, entry 5).   | <b>5</b>  |
| <b>Figure S4.</b> <sup>1</sup> H and <sup>13</sup> C NMR spectra of the polyisoprene obtained using Co1/AlMe <sub>2</sub> Cl (Table 2, entry 6).   | <b>6</b>  |
| <b>Figure S5.</b> <sup>1</sup> H and <sup>13</sup> C NMR spectra of the polyisoprene obtained using Co1/AlMe <sub>2</sub> Cl (Table 3, entry 2).   | <b>7</b>  |
| <b>Figure S6.</b> <sup>1</sup> H and <sup>13</sup> C NMR spectra of the polyisoprene obtained using Co1/AlMe <sub>2</sub> Cl (Table 3, entry 3).   | <b>8</b>  |
| <b>Figure S7.</b> <sup>1</sup> H and <sup>13</sup> C NMR spectra of the polyisoprene obtained using Co1/AlMe <sub>2</sub> Cl (Table 3, entry 5).   | <b>9</b>  |
| <b>Figure S8.</b> <sup>1</sup> H and <sup>13</sup> C NMR spectra of the polyisoprene obtained using Co1/AlMe <sub>2</sub> Cl (Table 3, entry 6).   | <b>10</b> |
| <b>Figure S9.</b> <sup>1</sup> H and <sup>13</sup> C NMR spectra of the polyisoprene obtained using Co1/AlMe <sub>2</sub> Cl (Table 3, entry 7).   | <b>11</b> |
| <b>Figure S10.</b> <sup>1</sup> H and <sup>13</sup> C NMR spectra of the polyisoprene obtained using Co1/AlMe <sub>2</sub> Cl (Table 3, entry 8).  | <b>12</b> |
| <b>Figure S11.</b> <sup>1</sup> H and <sup>13</sup> C NMR spectra of the polyisoprene obtained using Co1/AlMe <sub>2</sub> Cl (Table 3, entry 9).  | <b>13</b> |
| <b>Figure S12.</b> <sup>1</sup> H and <sup>13</sup> C NMR spectra of the polyisoprene obtained using Co1/AlMe <sub>2</sub> Cl (Table 3, entry 10). | <b>14</b> |
| <b>Figure S13.</b> <sup>1</sup> H and <sup>13</sup> C NMR spectra of the polyisoprene obtained using Co1/AlMe <sub>2</sub> Cl (Table 3, entry 11). | <b>15</b> |
| <b>Figure S14.</b> <sup>1</sup> H and <sup>13</sup> C NMR spectra of the polyisoprene obtained using Co1/AlMe <sub>2</sub> Cl (Table 3, entry 12). | <b>16</b> |
| <b>Figure S15.</b> <sup>1</sup> H and <sup>13</sup> C NMR spectra of the polyisoprene obtained using Co2/AlMe <sub>2</sub> Cl (Table 4, entry 2).  | <b>17</b> |
| <b>Figure S16.</b> <sup>1</sup> H and <sup>13</sup> C NMR spectra of the polyisoprene obtained using Co3/AlMe <sub>2</sub> Cl (Table 4, entry 3).  | <b>18</b> |
| <b>Figure S17.</b> <sup>1</sup> H and <sup>13</sup> C NMR spectra of the polyisoprene obtained using Co4/AlMe <sub>2</sub> Cl (Table 4, entry 4).  | <b>19</b> |
| <b>Figure S18.</b> <sup>1</sup> H and <sup>13</sup> C NMR spectra of the polyisoprene obtained using Co5/AlMe <sub>2</sub> Cl (Table 4, entry 5).  | <b>20</b> |

---

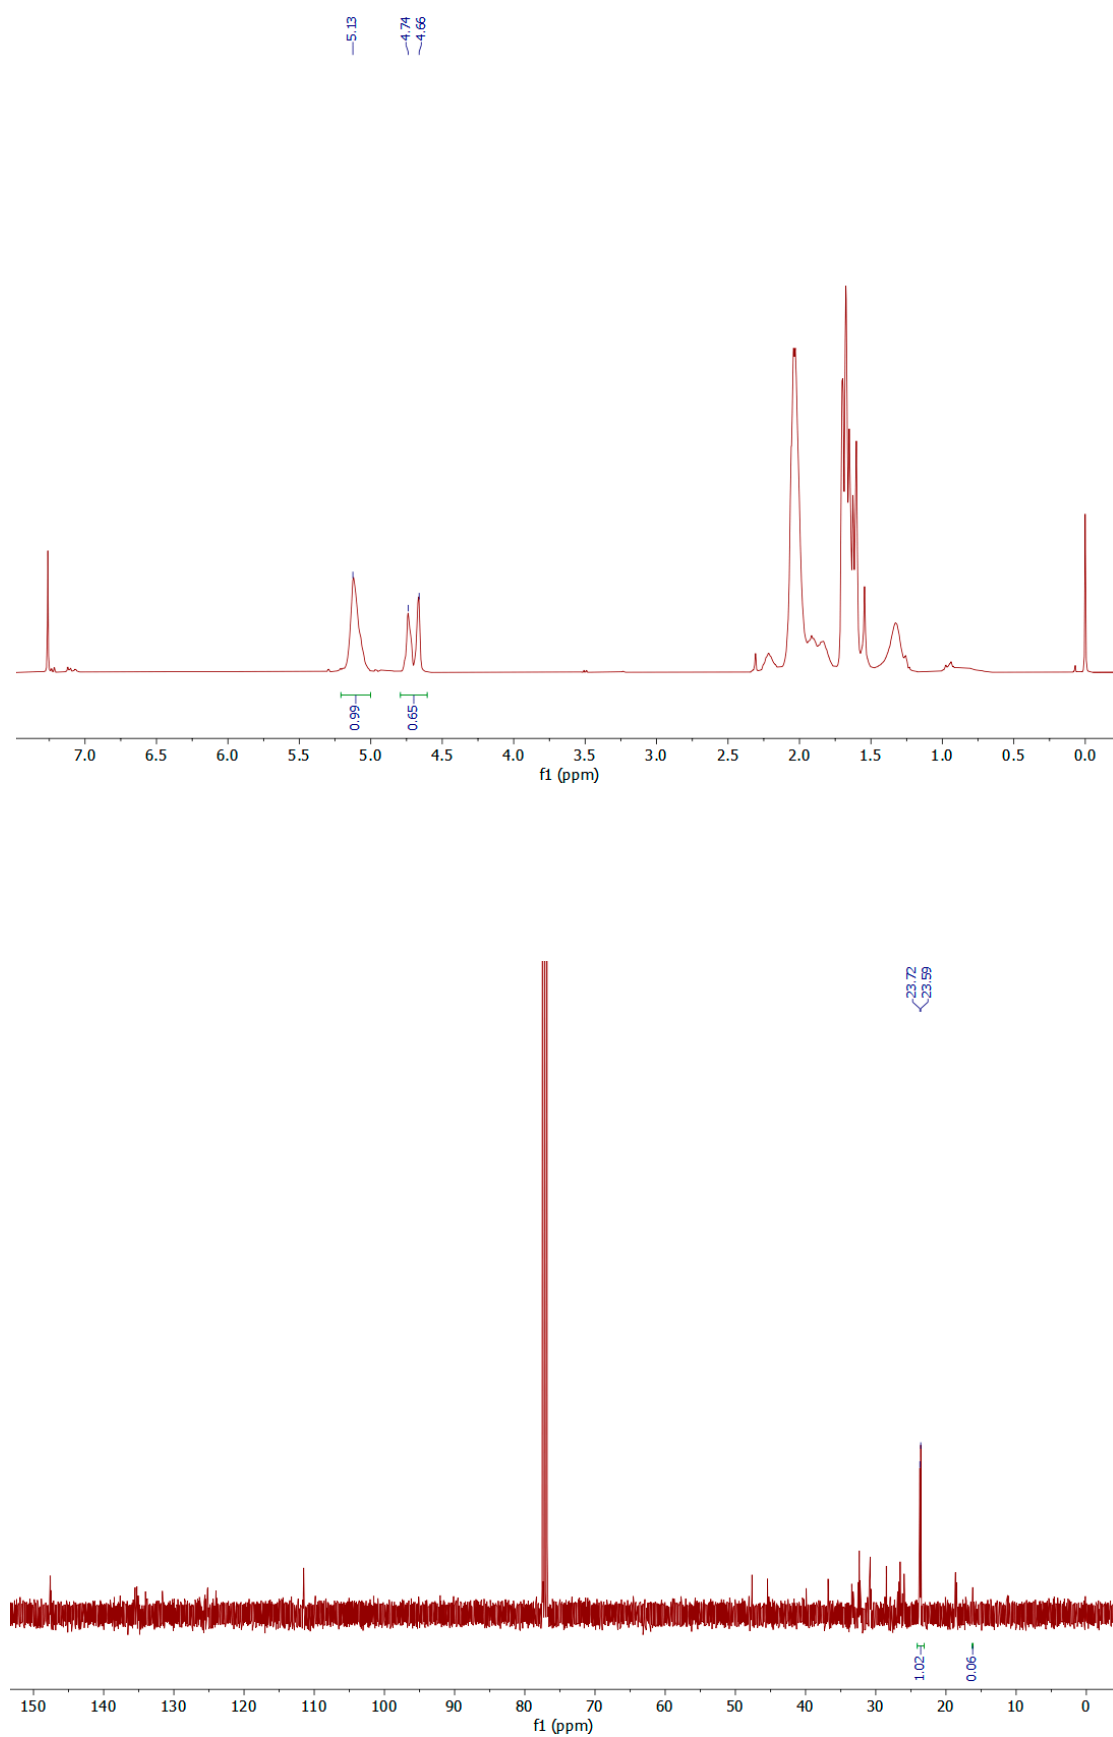

**Figure S1.**  $^1\text{H}$  and  $^{13}\text{C}$  NMR spectra of the polyisoprene obtained using  $\text{Co1}/\text{AlMe}_2\text{Cl}$  (Table 2, entry 3).

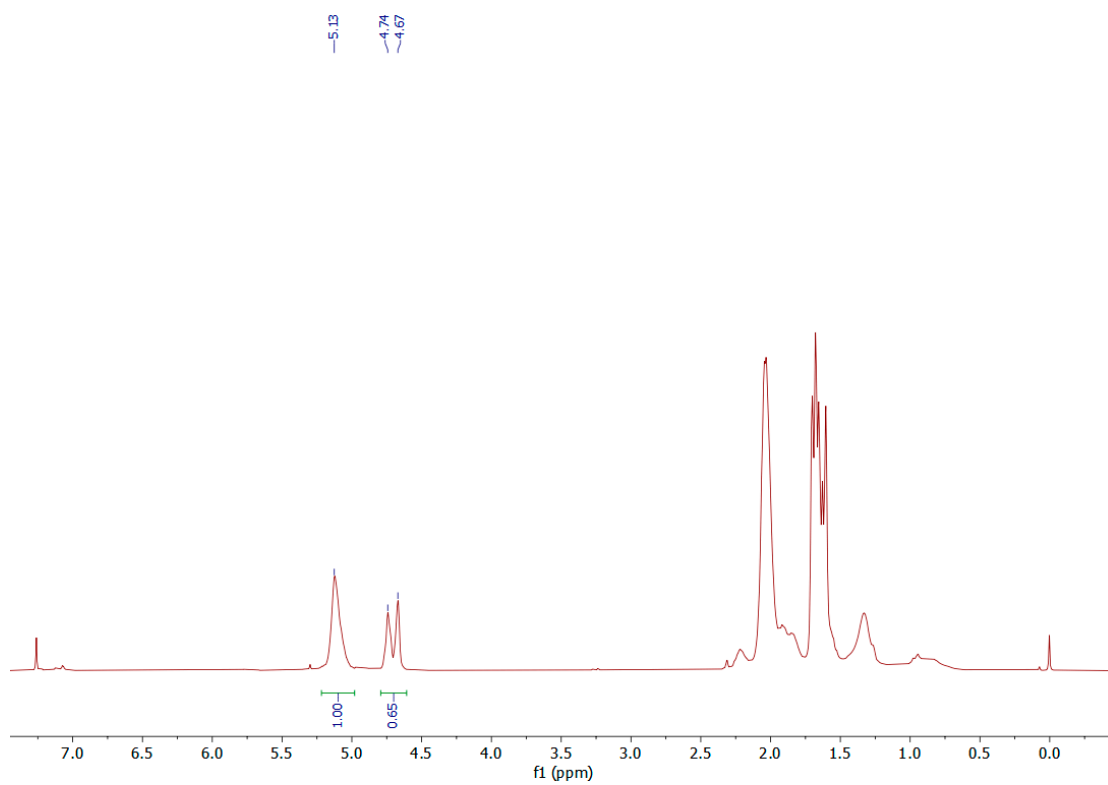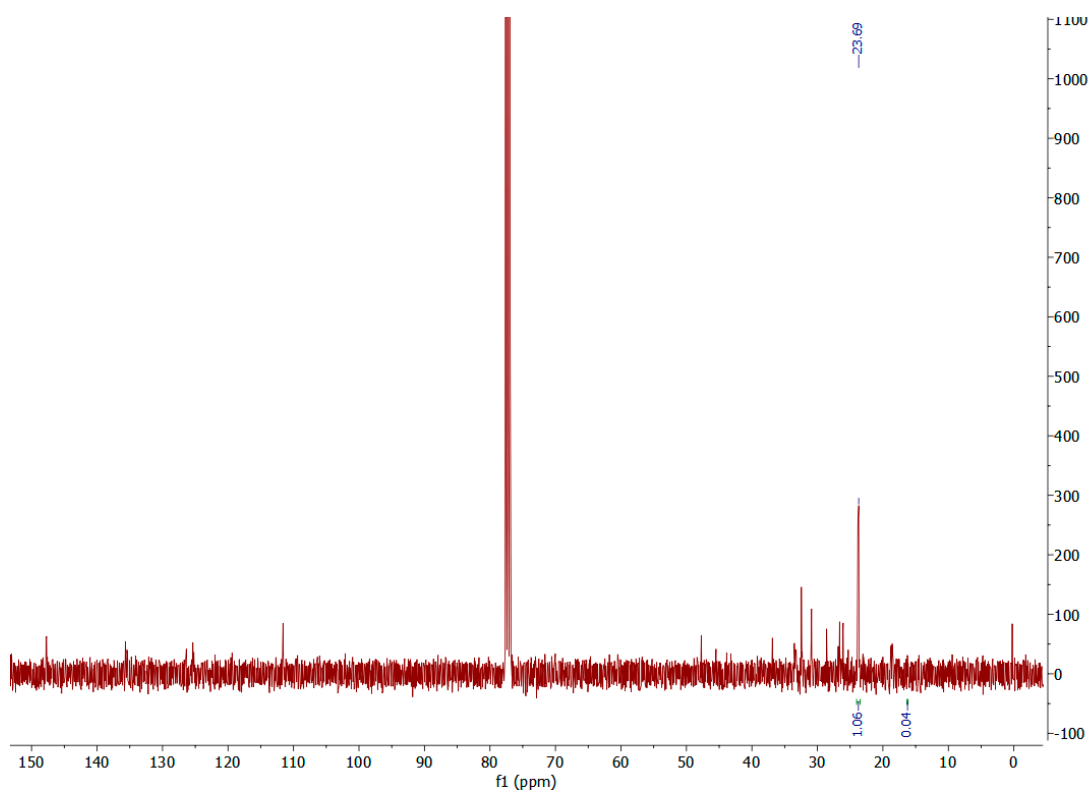

**Figure S2.** <sup>1</sup>H and <sup>13</sup>C NMR spectra of the polyisoprene obtained using Co1/AlMe<sub>2</sub>Cl (Table 2, entry 4).

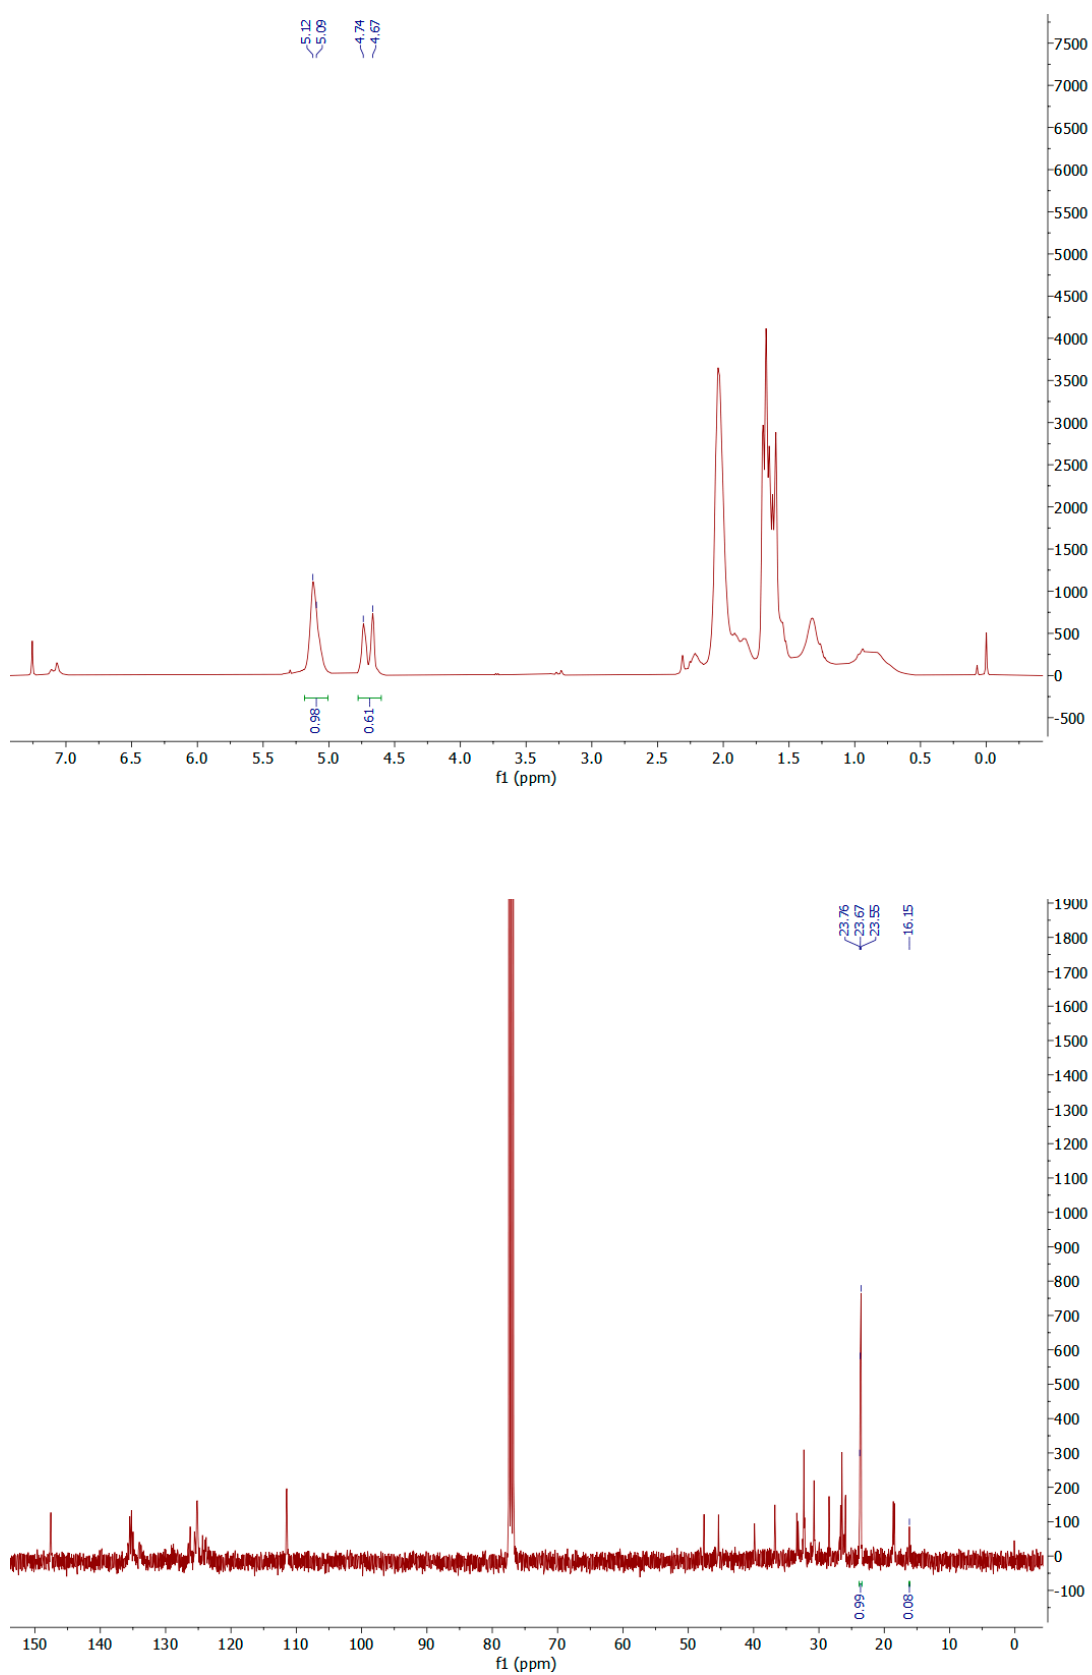

**Figure S3.**  $^1\text{H}$  and  $^{13}\text{C}$  NMR spectra of the polyisoprene obtained using  $\text{Co1}/\text{AlMe}_2\text{Cl}$  (Table 2, entry 5).

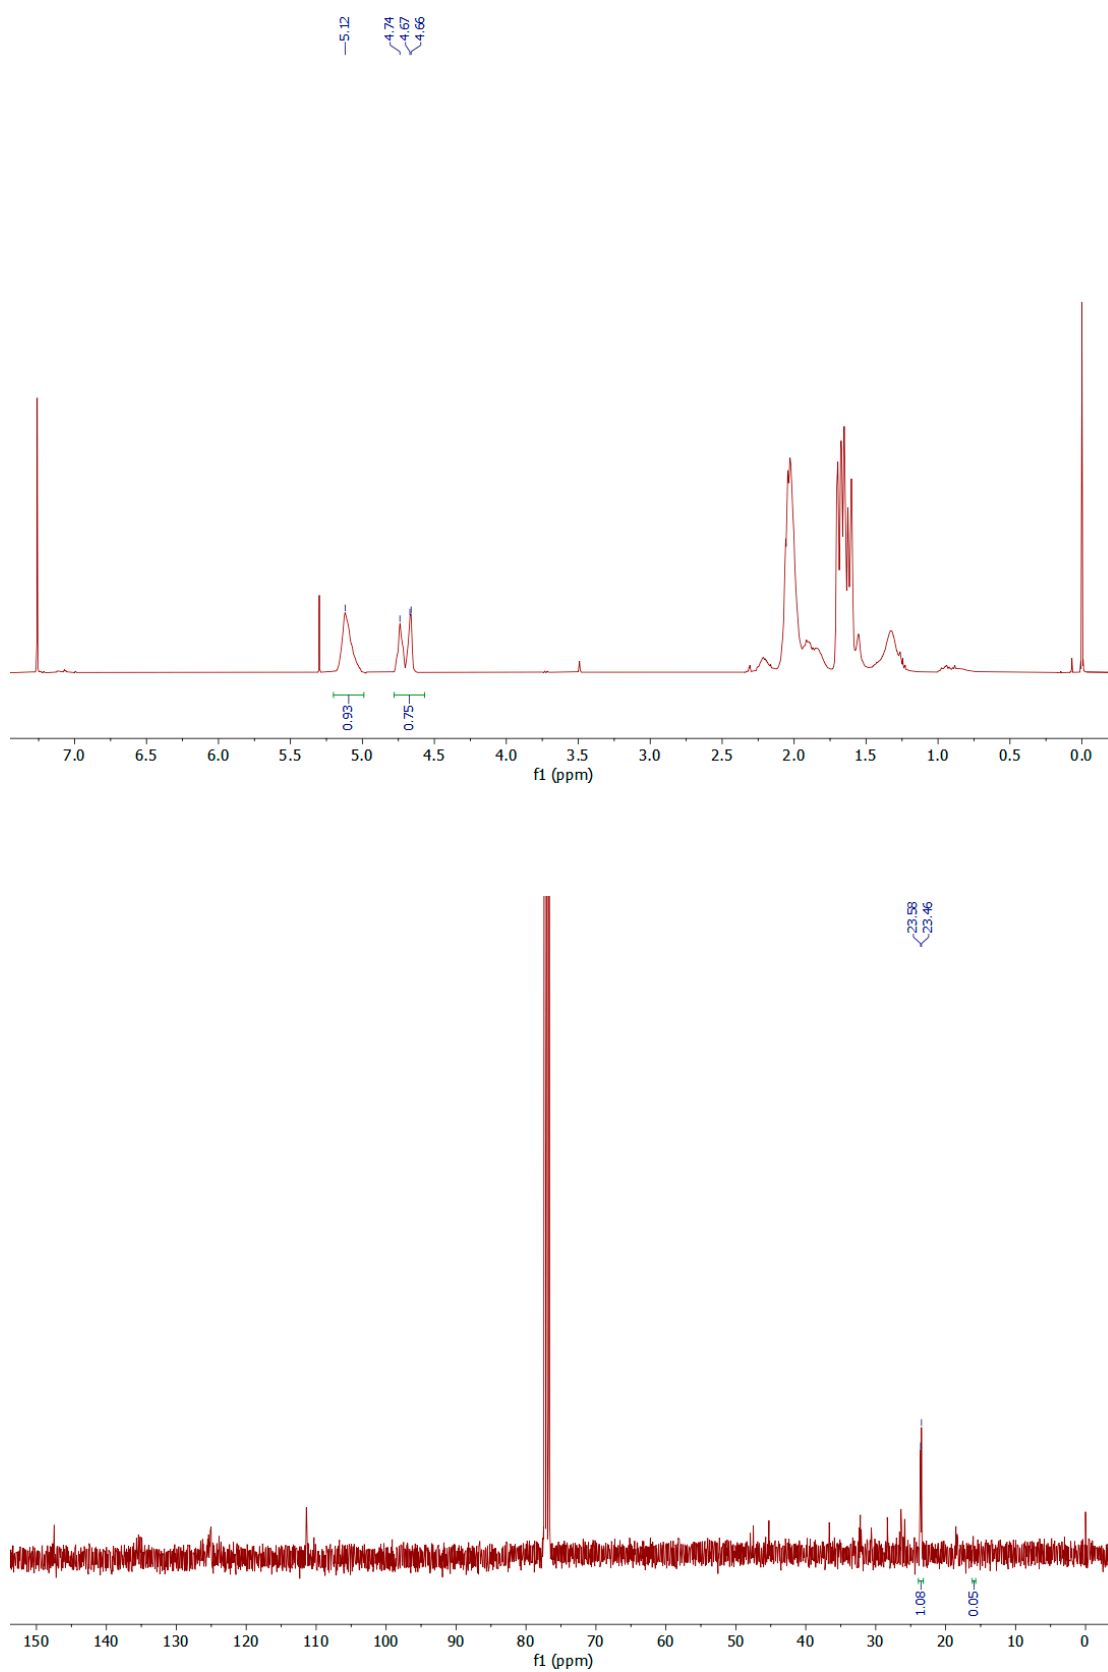

**Figure S4.**  $^1\text{H}$  and  $^{13}\text{C}$  NMR spectra of the polyisoprene obtained using  $\text{Co1}/\text{AlMe}_2\text{Cl}$  (Table 2, entry 6).

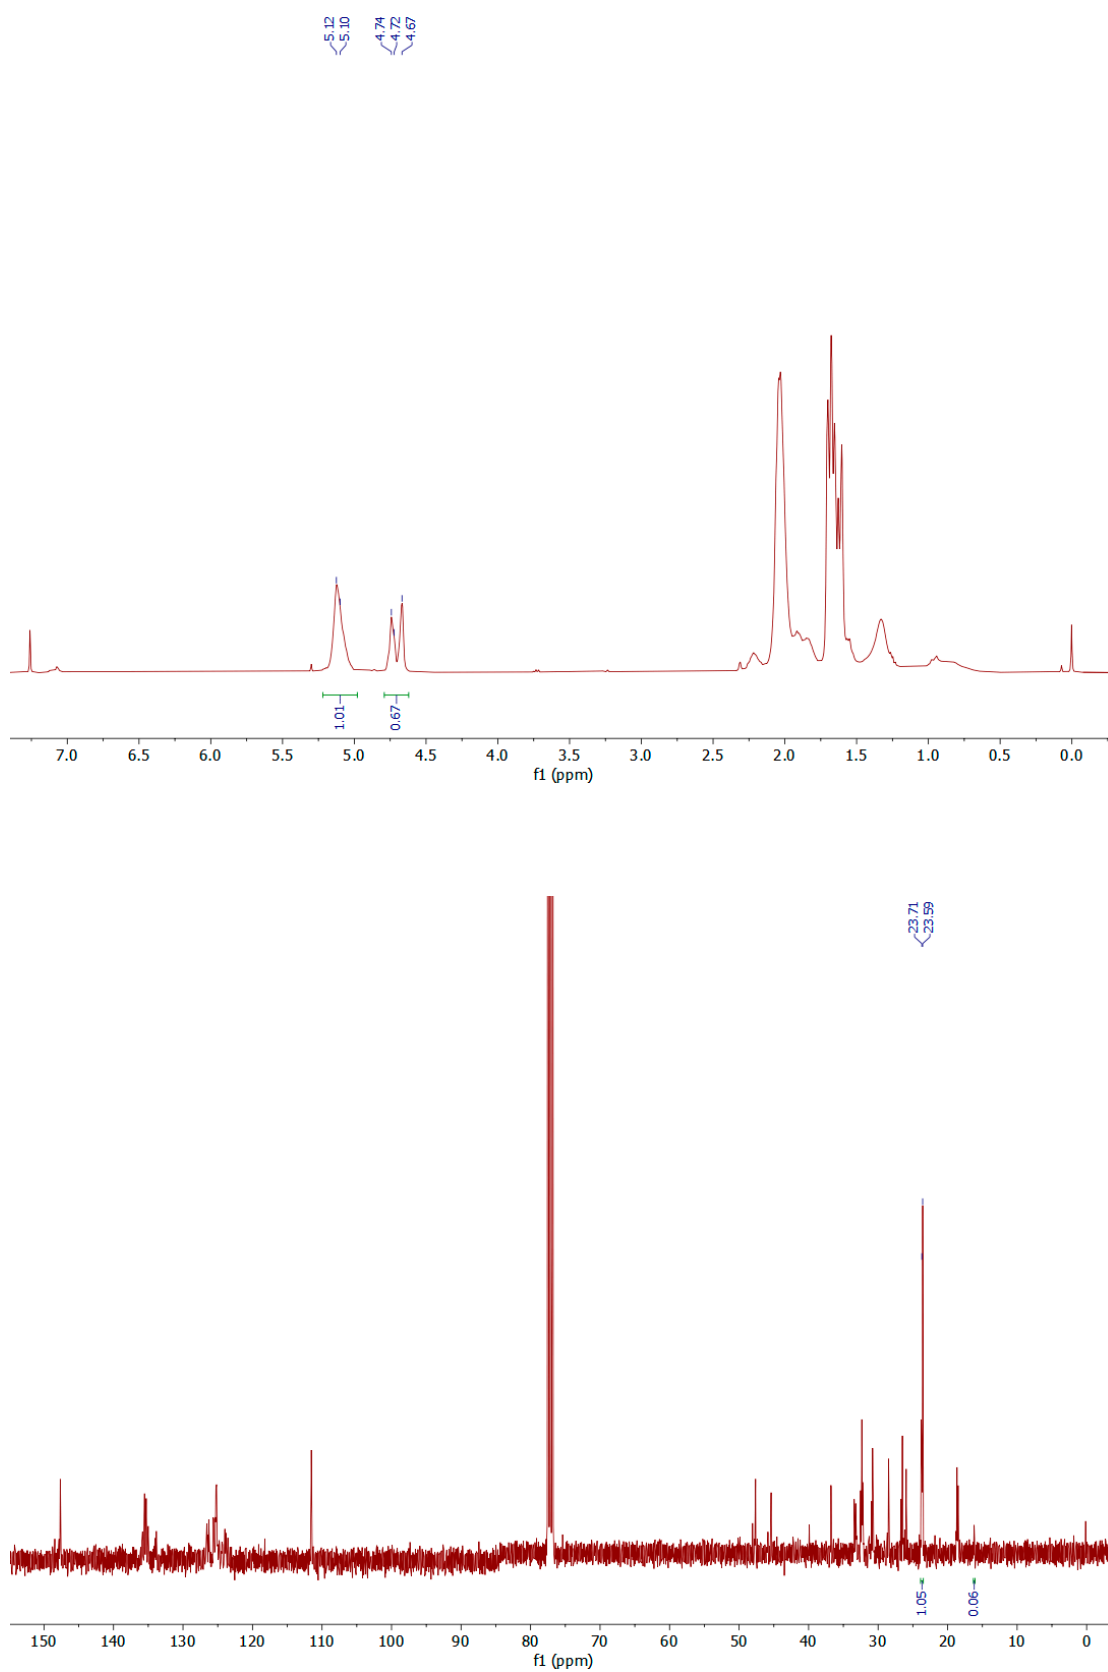

**Figure S5.**  $^1\text{H}$  and  $^{13}\text{C}$  NMR spectra of the polyisoprene obtained using **Co1**/ $\text{AlMe}_2\text{Cl}$  (Table 3, entry 2).

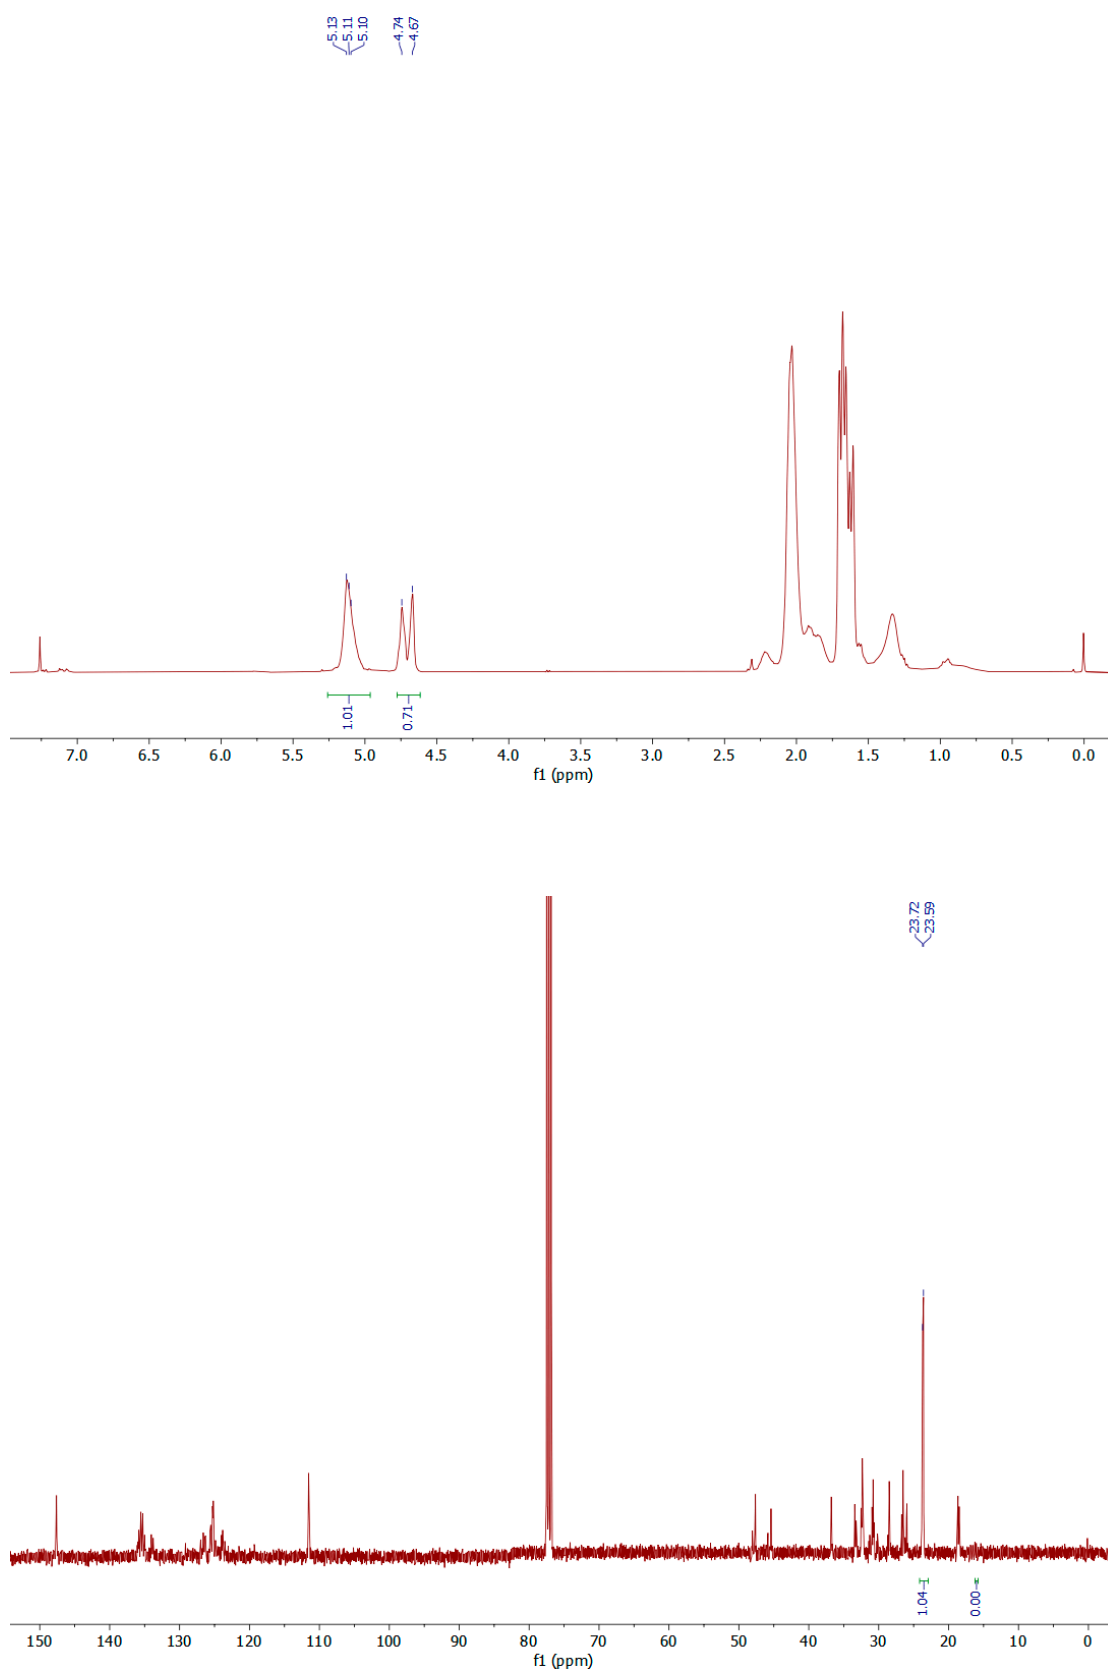

**Figure S6.**  $^1\text{H}$  and  $^{13}\text{C}$  NMR spectra of the polyisoprene obtained using  $\text{Co1}/\text{AlMe}_2\text{Cl}$  (Table 3, entry 3).

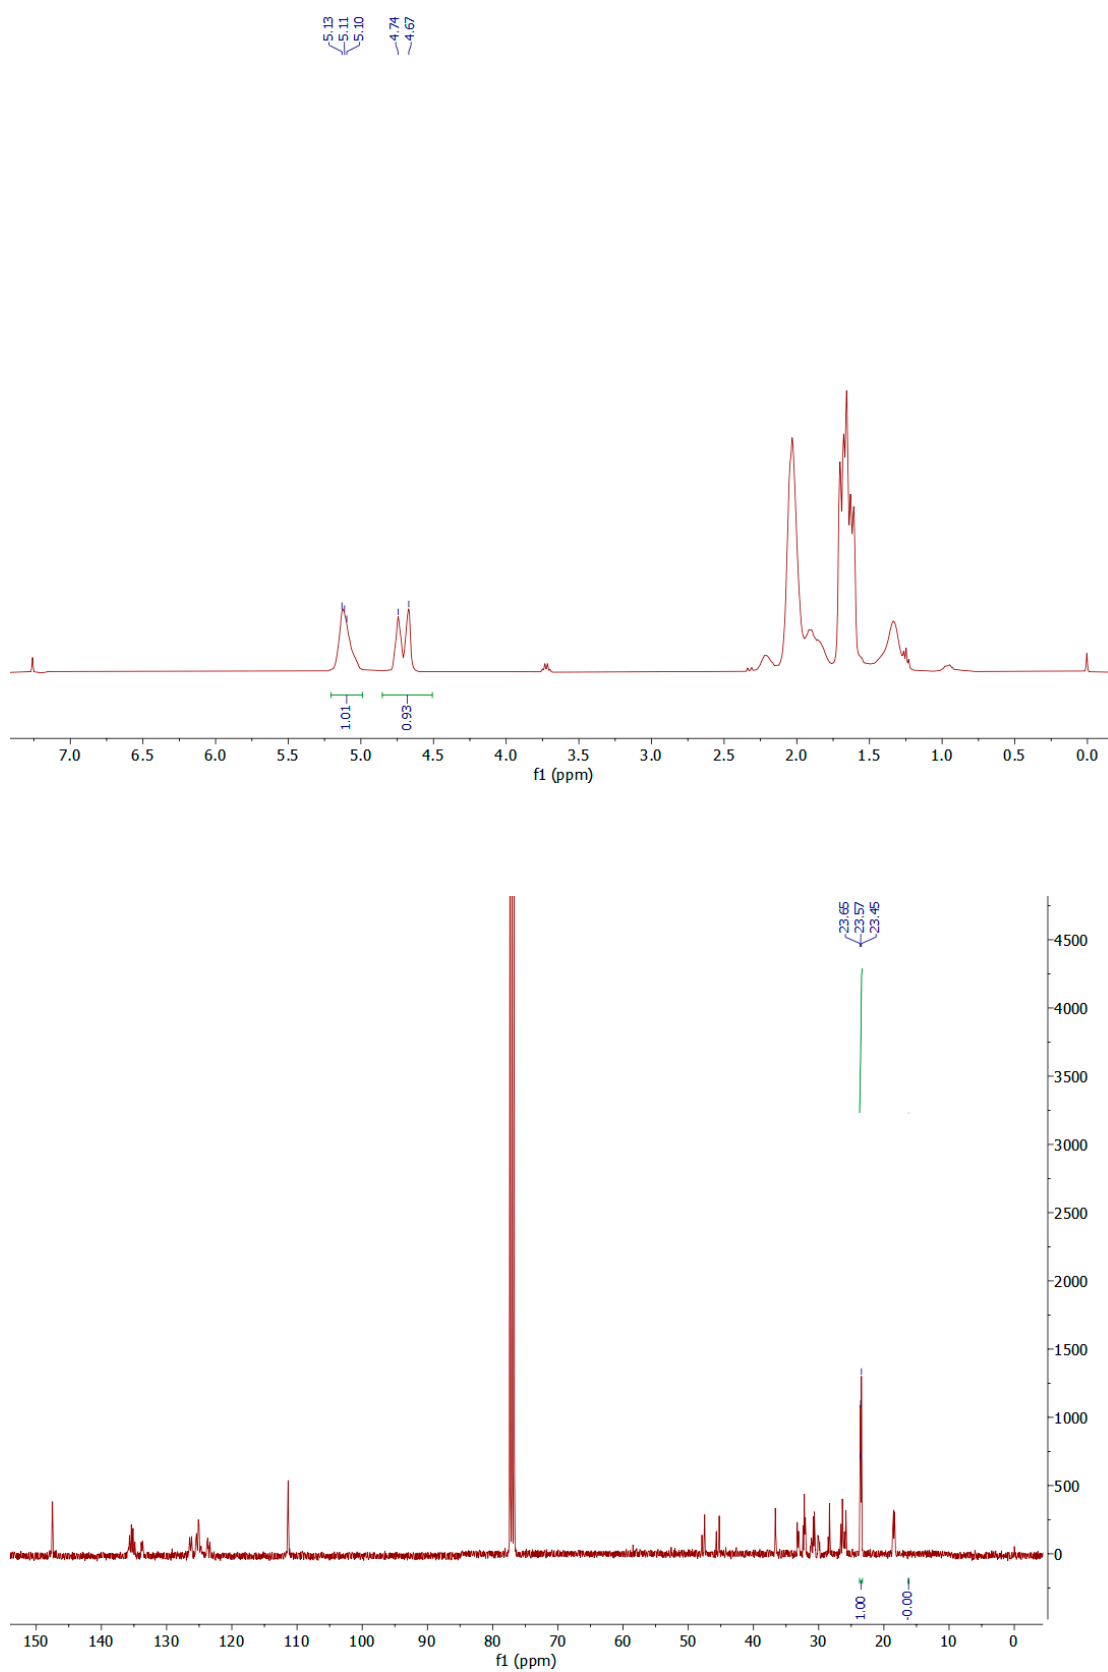

**Figure S7.**  $^1\text{H}$  and  $^{13}\text{C}$  NMR spectra of the polyisoprenes obtained using **Co1**/AlMe<sub>2</sub>Cl (Table 3, entry 5).



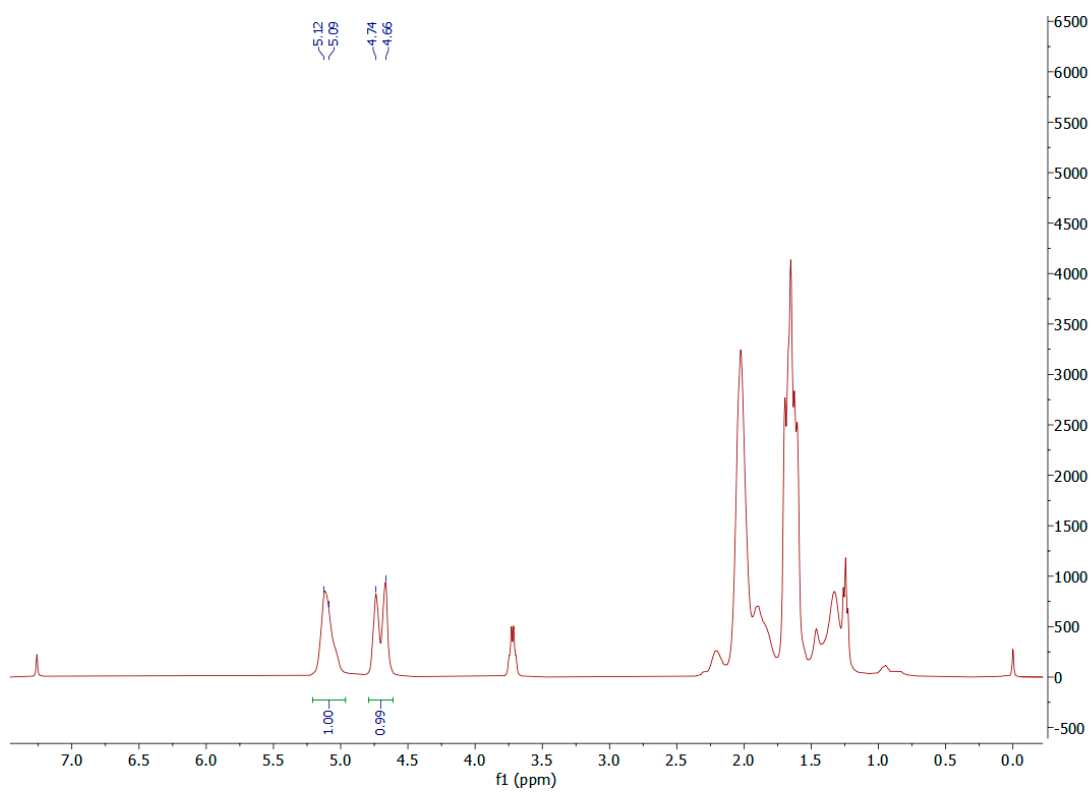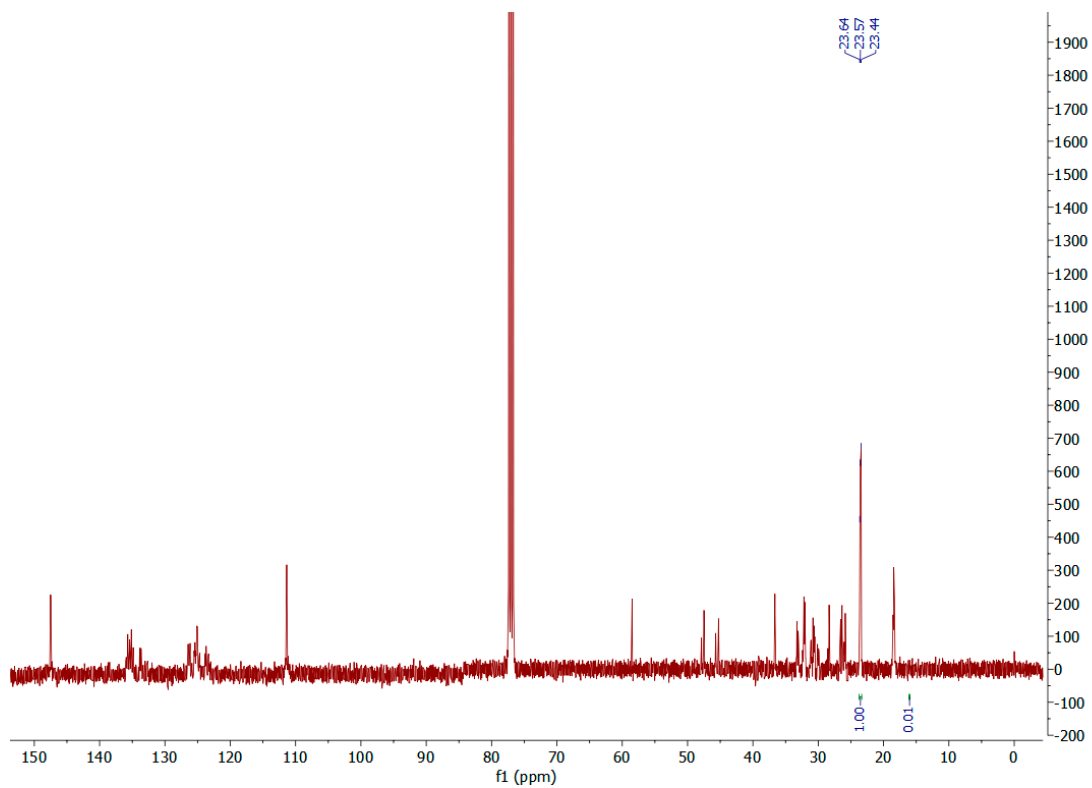

**Figure S8.** <sup>1</sup>H and <sup>13</sup>C NMR spectra of the polyisoprene obtained using Co1/AlMe<sub>2</sub>Cl (Table 3, entry 6).

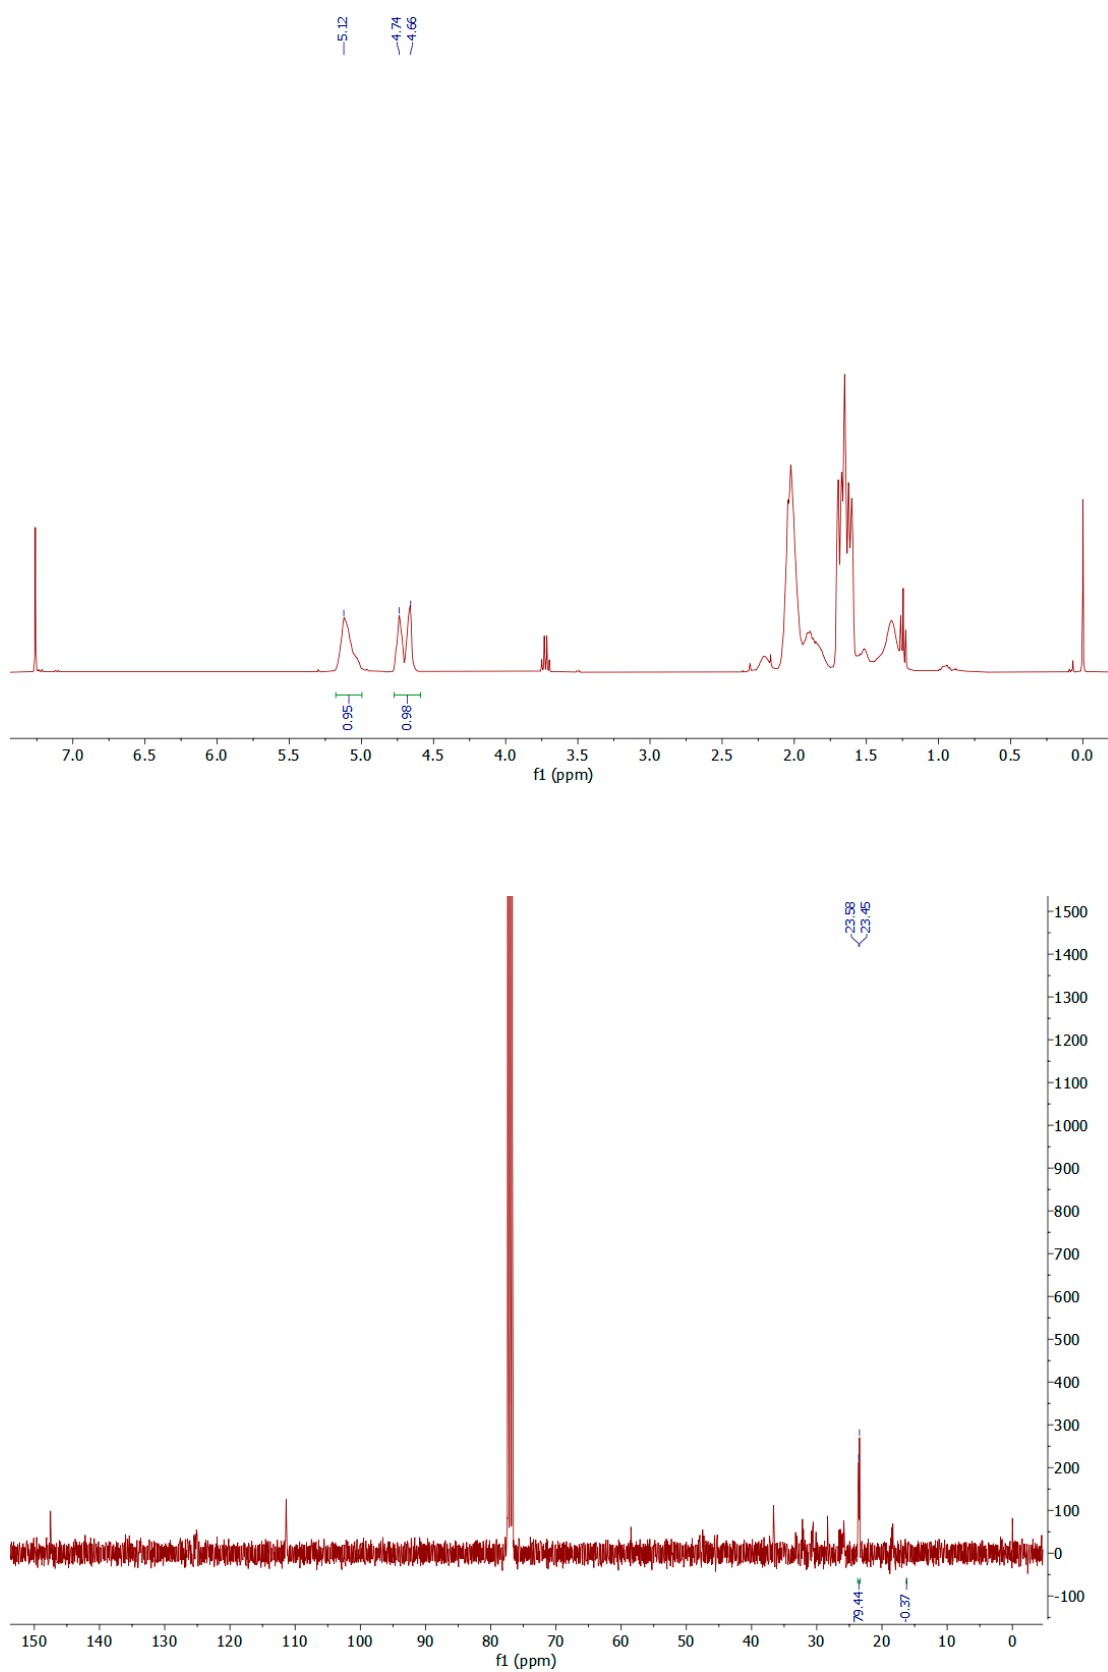

**Figure S9.**  $^1\text{H}$  and  $^{13}\text{C}$  NMR spectra of the polyisoprene obtained using  $\text{Co1}/\text{AlMe}_2\text{Cl}$  (Table 3, entry 7).

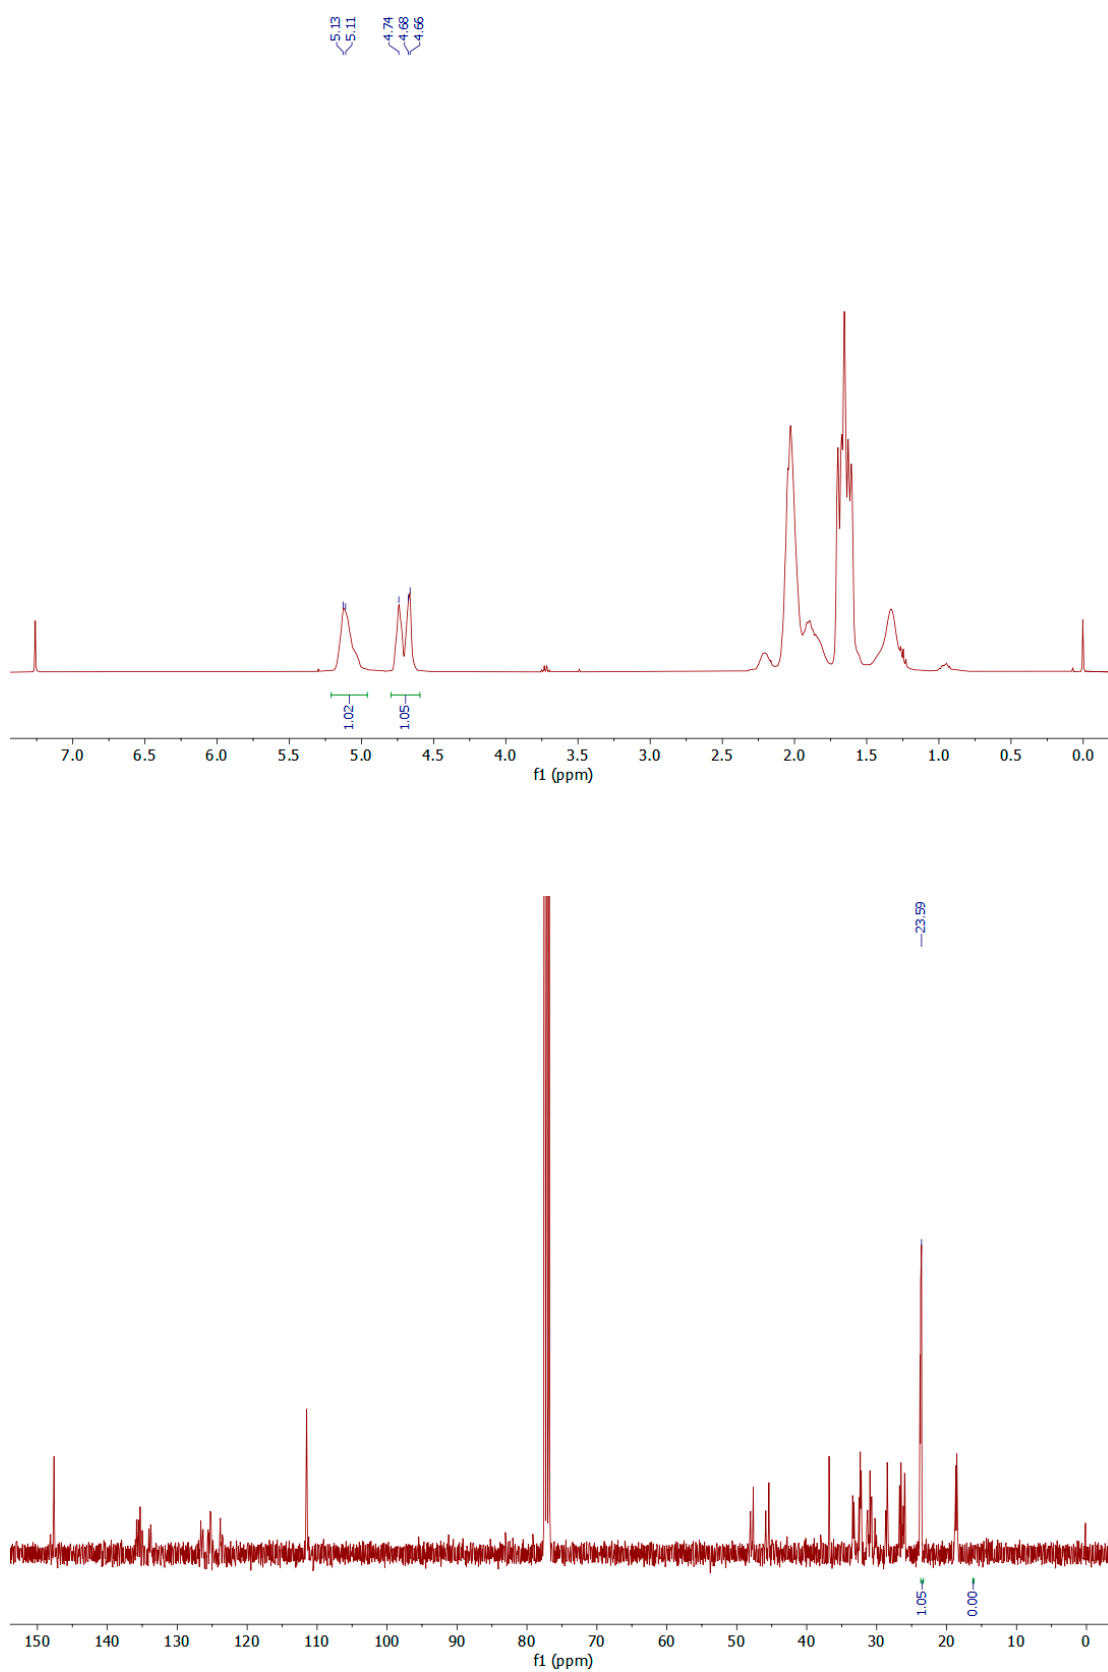

**Figure S10.**  $^1\text{H}$  and  $^{13}\text{C}$  NMR spectra of the polyisoprene obtained using **Co1**/ $\text{AlMe}_2\text{Cl}$  (Table 3, entry 8).

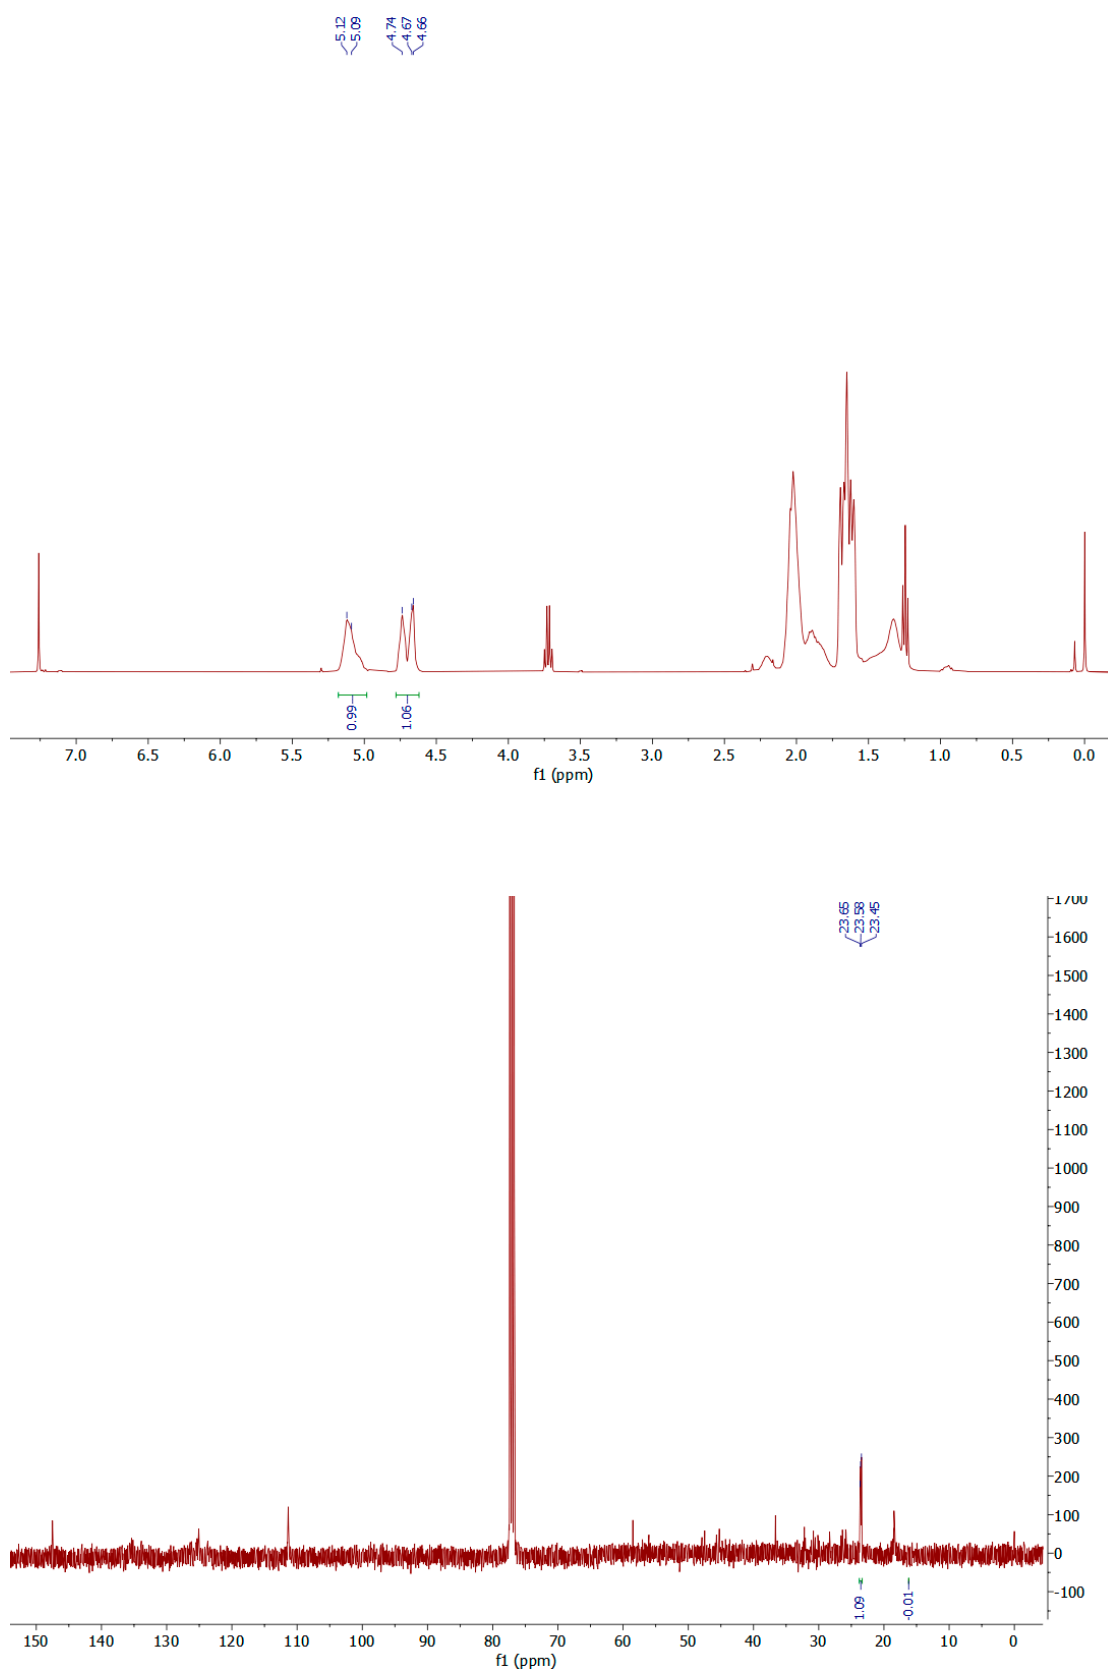

**Figure S11.**  $^1\text{H}$  and  $^{13}\text{C}$  NMR spectra of the polyisoprenes obtained using **Co1**/AlMe<sub>2</sub>Cl (Table 3, entry 9).

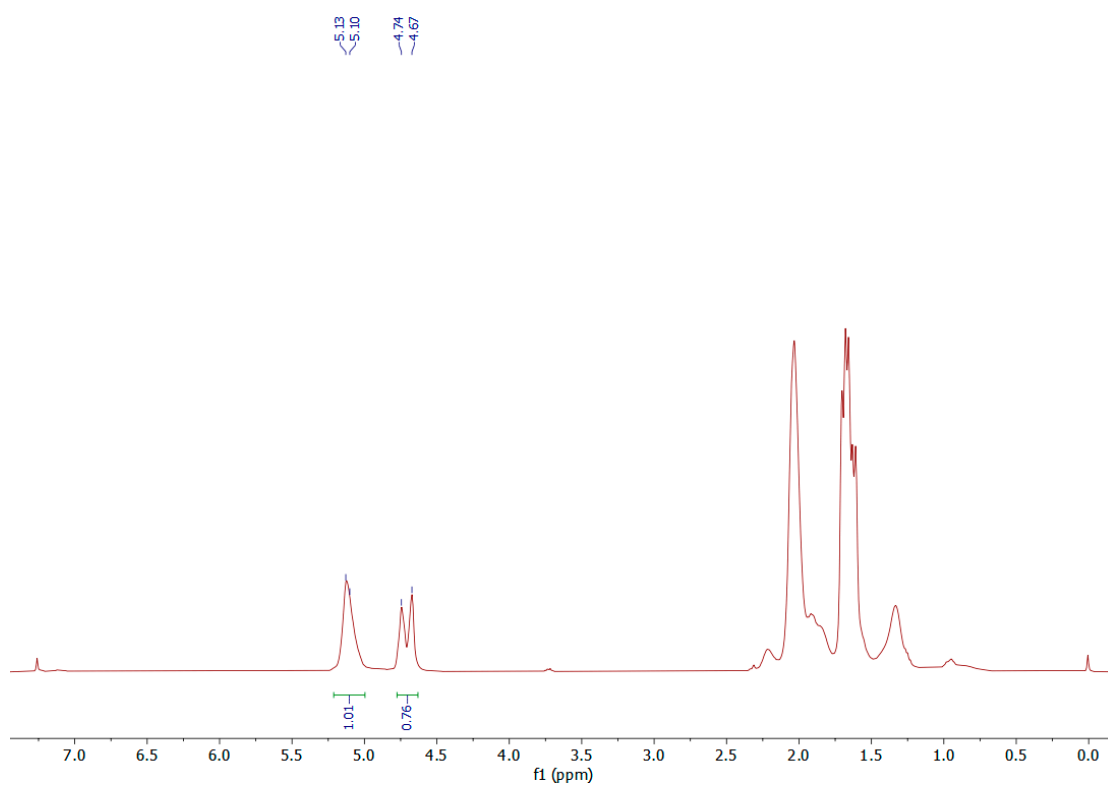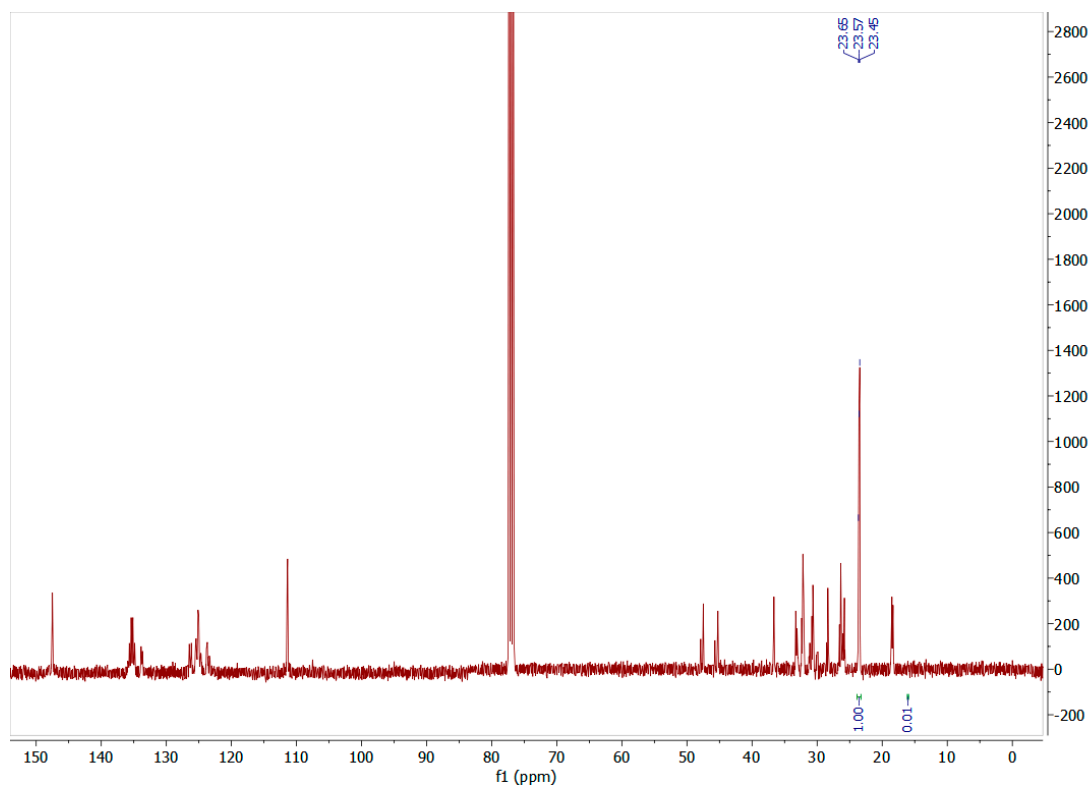

**Figure S12.** <sup>1</sup>H and <sup>13</sup>C NMR spectra of the polyisoprene obtained using Co1/AlMe<sub>2</sub>Cl (Table 3, entry 10).

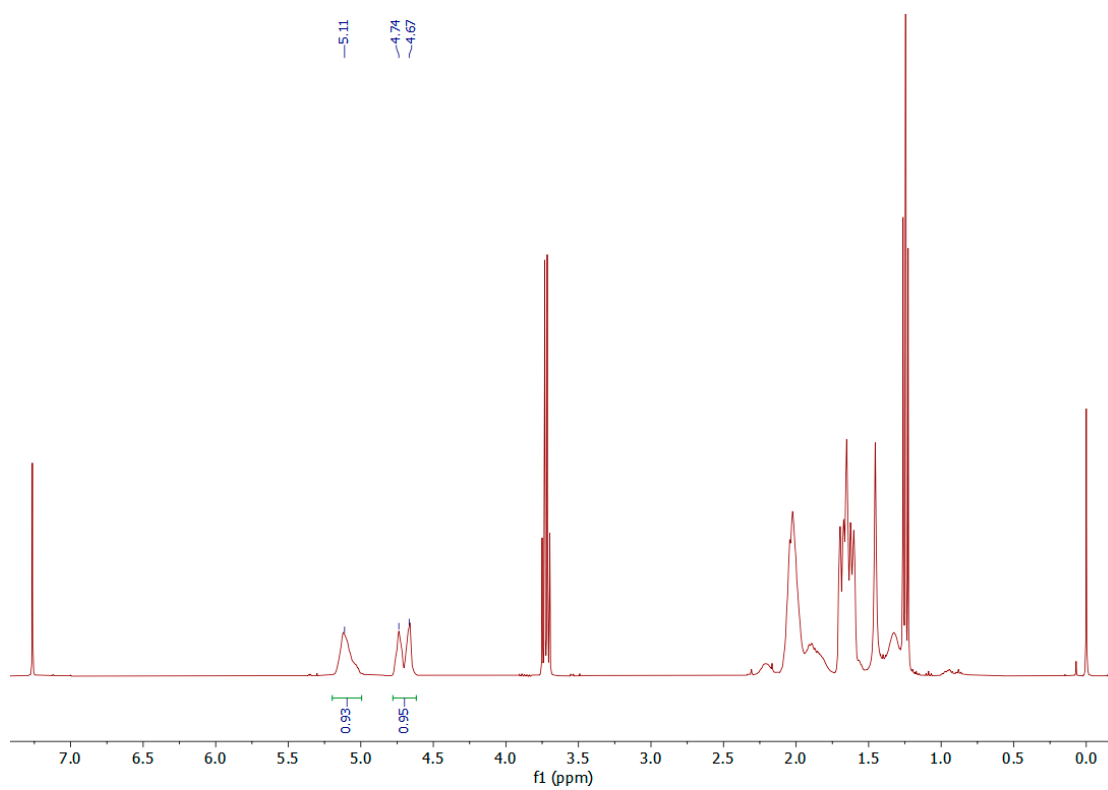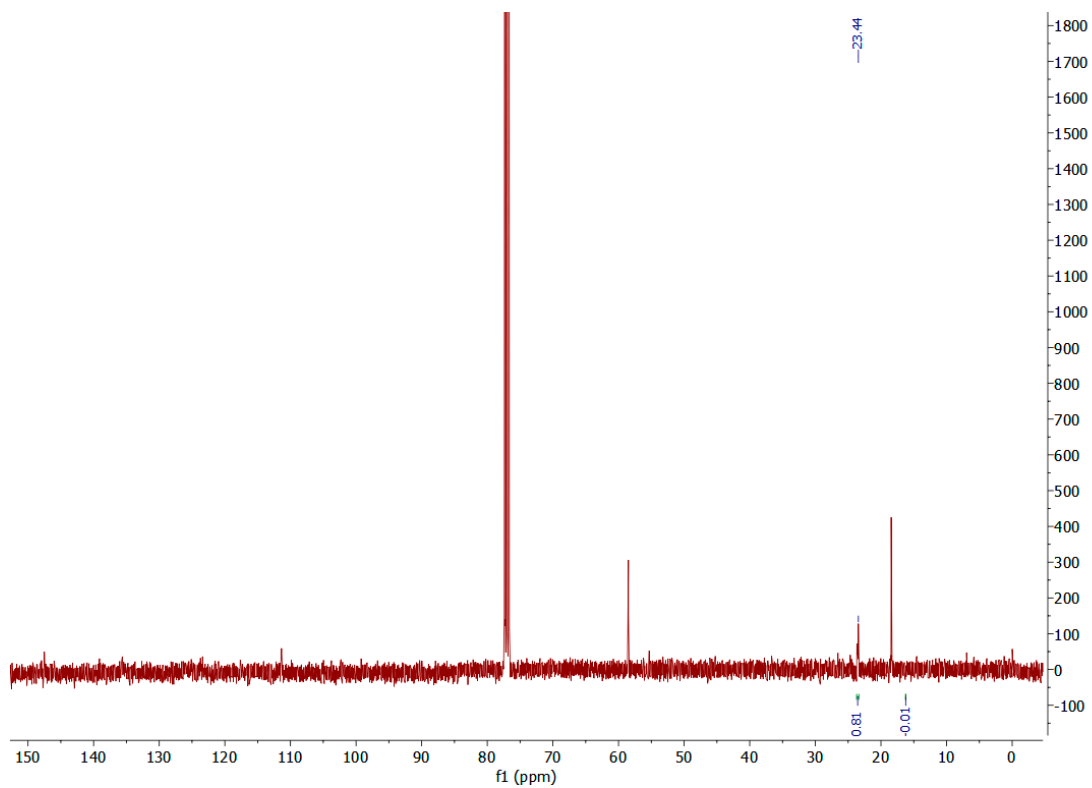

**Figure S13.** <sup>1</sup>H and <sup>13</sup>C NMR spectra of the polyisoprenes obtained using Co1/AlMe<sub>2</sub>Cl (Table 3, entry 11).

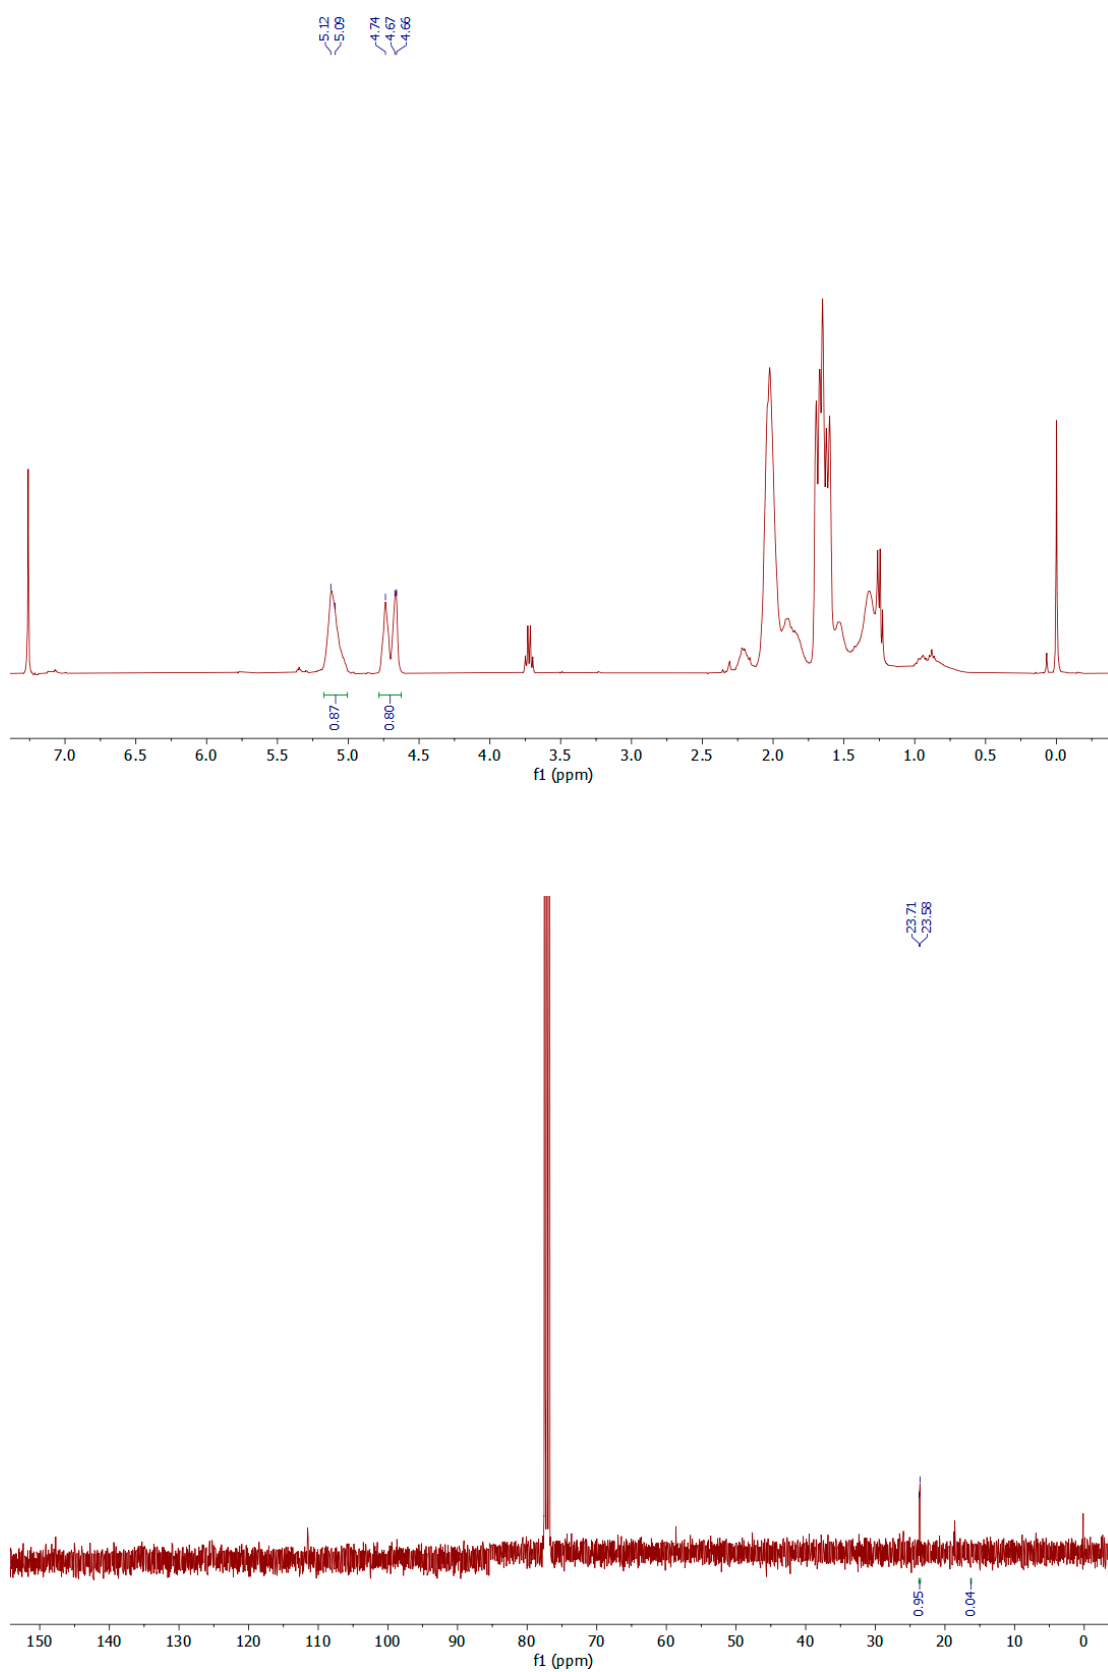

**Figure S14.**  $^1\text{H}$  and  $^{13}\text{C}$  NMR spectra of the polyisoprenes obtained using **Co1**/ $\text{AlMe}_2\text{Cl}$  (Table 3, entry 12).

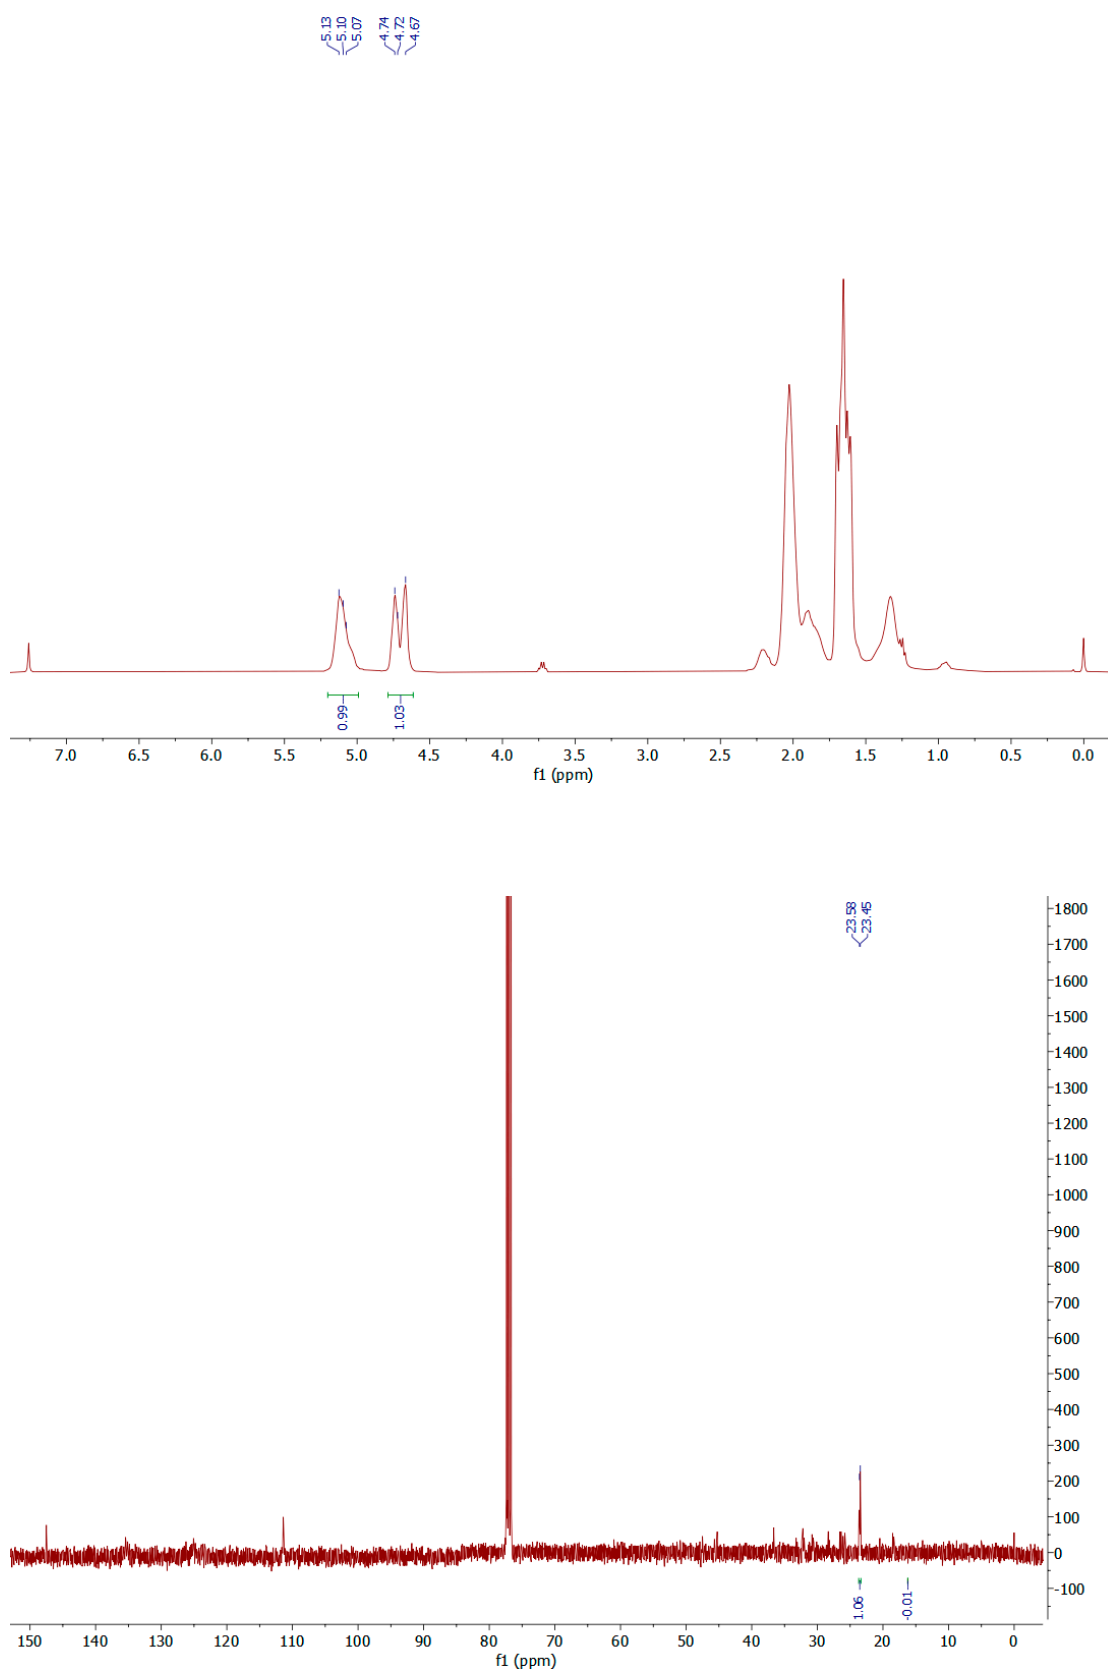

**Figure S15.**  $^1\text{H}$  and  $^{13}\text{C}$  NMR spectra of the polyisoprene obtained using  $\text{Co}_2/\text{AlMe}_2\text{Cl}$  (Table 4, entry 2).



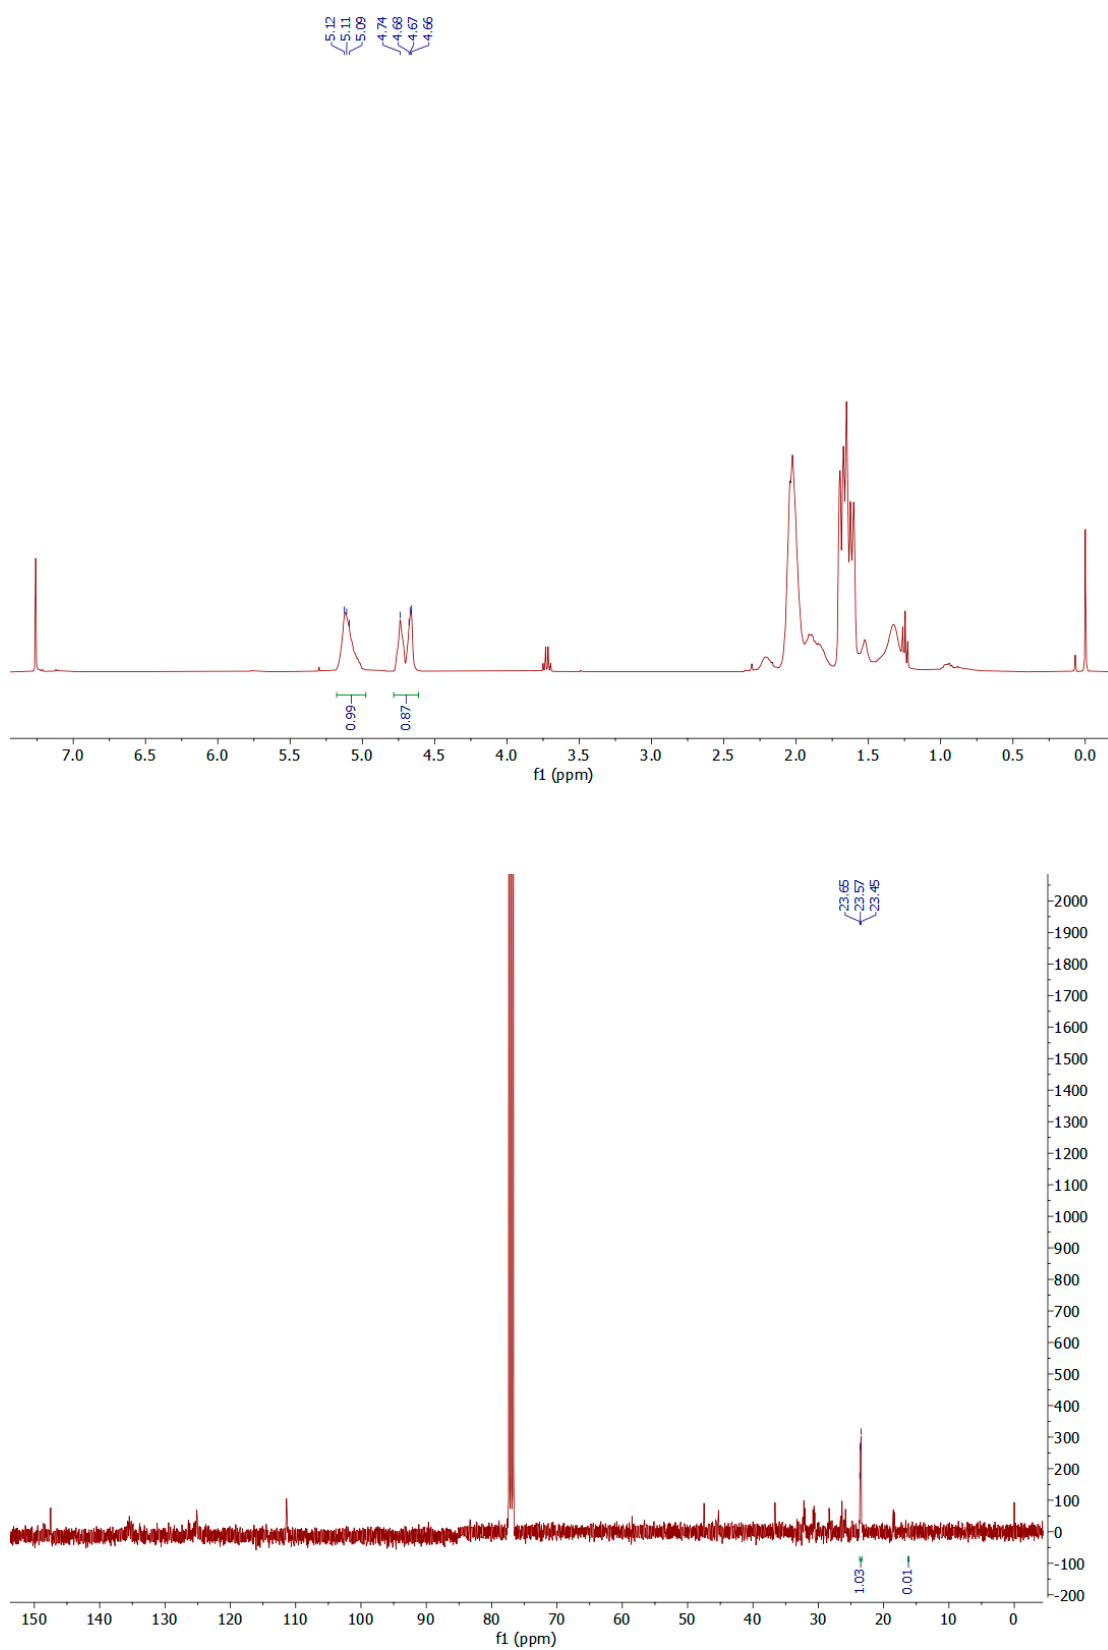

**Figure S16.**  $^1\text{H}$  and  $^{13}\text{C}$  NMR spectra of the polyisoprene obtained using  $\text{Co3}/\text{AlMe}_2\text{Cl}$  (Table 4, entry 3).

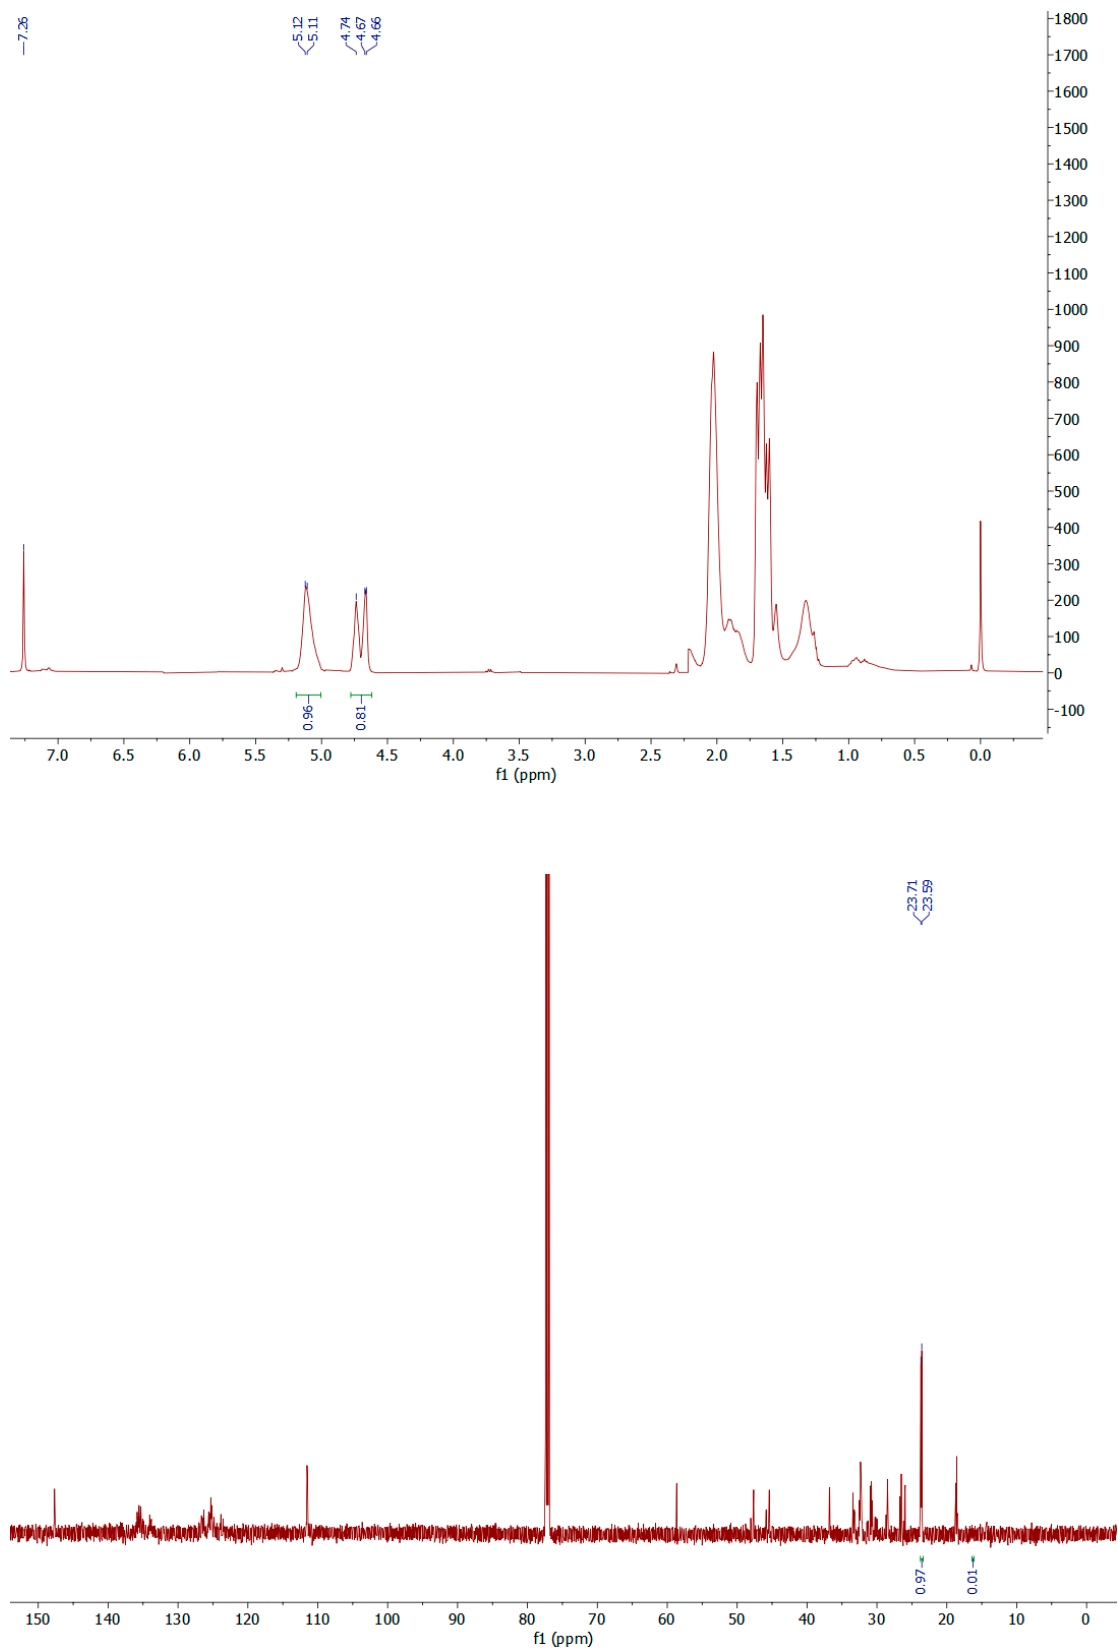

**Figure S17.**  $^1\text{H}$  and  $^{13}\text{C}$  NMR spectra of the polyisoprene obtained using **Co4**/AlMe<sub>2</sub>Cl (Table 4, entry 4).

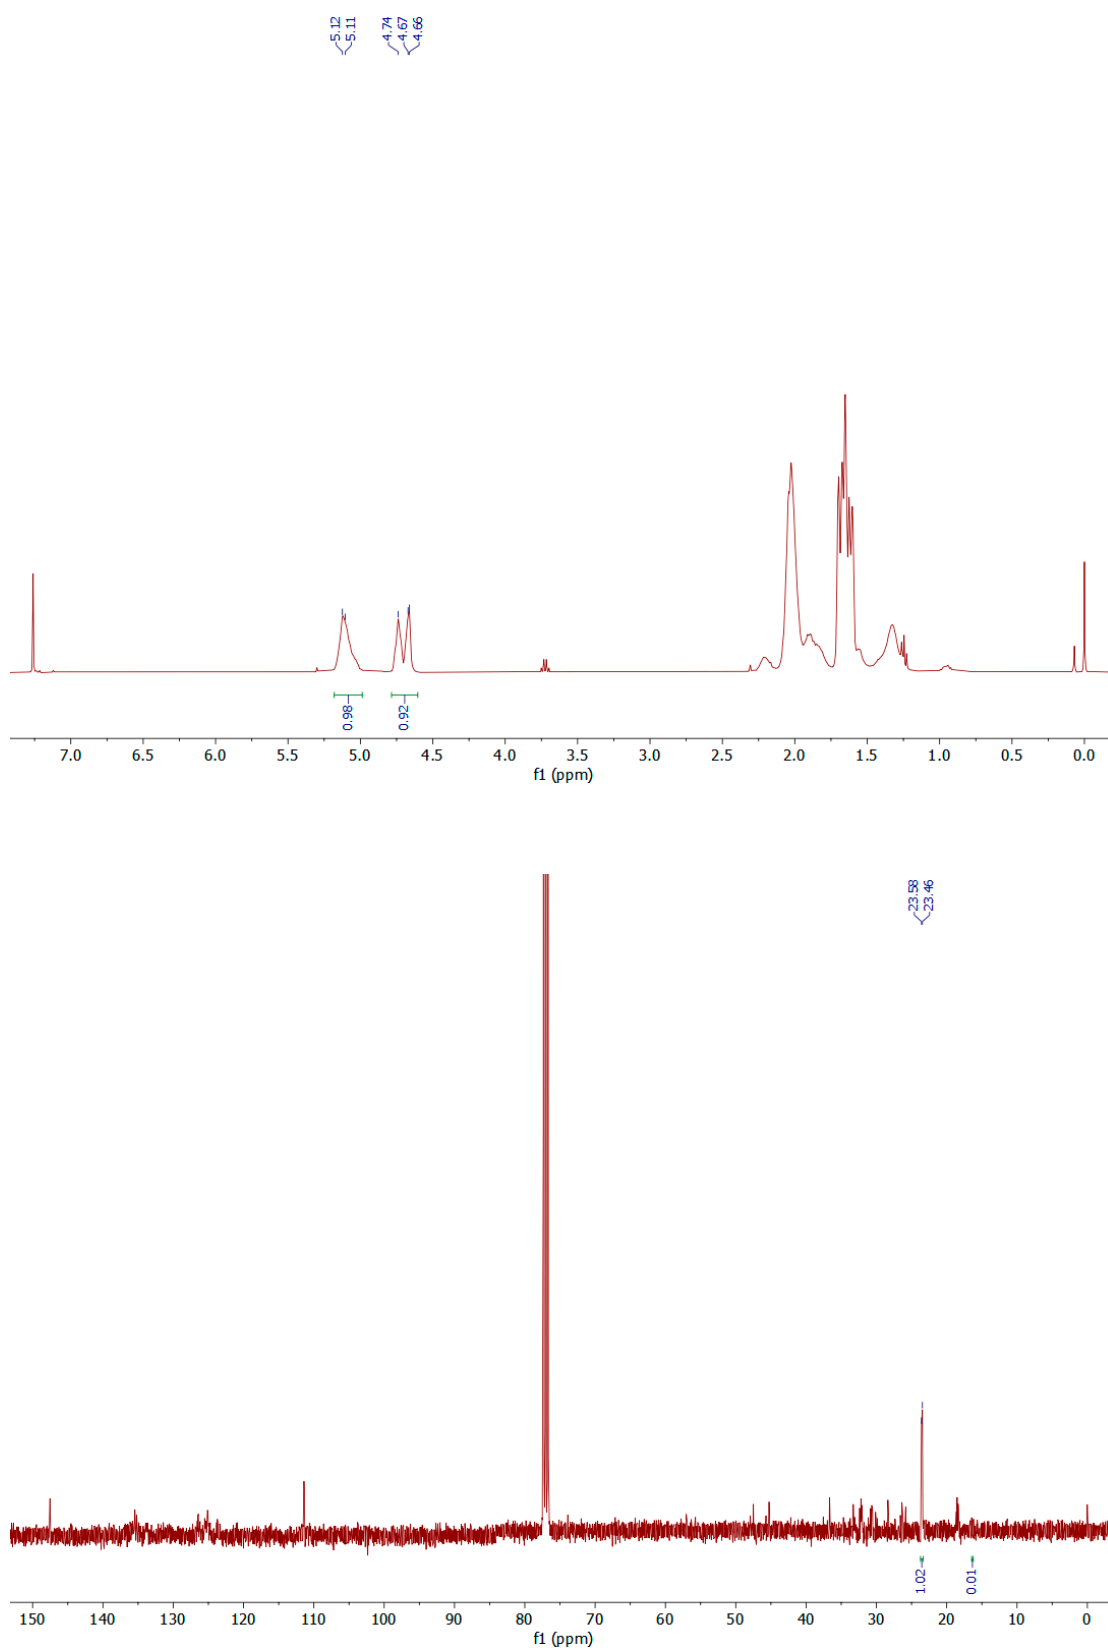

**Figure S18.**  $^1\text{H}$  and  $^{13}\text{C}$  NMR spectra of the polyisoprene obtained using Co5/AlMe<sub>2</sub>Cl (Table 4, entry 5).
